1 **A nuclear hormone receptor and lipid metabolism axis are required for the**  
2 **maintenance and regeneration of reproductive organs**

3  
4  
5  
6  
7 Shasha Zhang<sup>1</sup>, Longhua Guo<sup>2</sup>, Carlos Guerrero-Hernández<sup>1</sup>, Eric J Ross<sup>1</sup>, Kirsten Gotting<sup>3</sup>,  
8 Sean A. McKinney<sup>1</sup>, Wei Wang<sup>1</sup>, Youbin Xiang<sup>1</sup>, R. Scott Hawley<sup>1</sup>, Alejandro Sánchez  
9 Alvarado<sup>1,4\*</sup>

10  
11  
12  
13  
14  
15  
16  
17  
18 <sup>1</sup>Stowers Institute for Medical Research

19 <sup>2</sup>Current address: University of California, Los Angeles

20 <sup>3</sup>Current address: University of Wisconsin, Madison

21 <sup>4</sup>Howard Hughes Medical Institute

22  
23  
24  
25 \*corresponding author: [asa@stowers.org](mailto:asa@stowers.org)

26  
27  
28 Short Title: reproductive system maintenance and regeneration

29  
30 Keywords: nuclear hormone receptor, lipid metabolism, reproduction

31

32 **ABSTRACT**

33

34 Understanding how stem cells and their progeny maintain and regenerate reproductive organs  
35 is of fundamental importance. The freshwater planarian *Schmidtea mediterranea* provides an  
36 attractive system to study these processes because its hermaphroditic reproductive system  
37 (RS) arises post-embryonically and when lost can be fully and functionally regenerated from  
38 the proliferation and regulation of experimentally accessible stem and progenitor cells. By  
39 controlling the function of a nuclear hormone receptor gene (*nhr-1*), we established conditions  
40 in which to study the formation, maintenance and regeneration of both germline and somatic  
41 tissues of the planarian RS. We found that *nhr-1(RNAi)* not only resulted in the gradual  
42 degeneration and complete loss of the adult hermaphroditic RS, but also in the significant  
43 downregulation of a large cohort of genes associated with lipid metabolism. One of these,  
44 *Smed-acsc-1*, a homologue of Acyl-CoA synthetase, was indispensable for the development,  
45 maintenance and regeneration of the RS, but not for the homeostasis or regeneration of other  
46 somatic tissues. Remarkably, supplementing *nhr-1(RNAi)* animals with either bacterial Acyl-  
47 CoA synthetase or the lipid metabolite Acetyl-CoA rescued the phenotype restoring the  
48 maintenance and function of the hermaphroditic RS. Our findings uncovered a likely  
49 evolutionarily conserved role for nuclear hormone receptors and lipid metabolism in the  
50 regulation of stem and progenitor cells required for the long-term maintenance and  
51 regeneration of animal reproductive organs, tissues and cells.

52

## 53 INTRODUCTION

54

55 The adult organs of most organisms are actively maintained by a complex interplay of cellular  
56 and metabolic homeostatic processes that include hormonal regulation, the maintenance of  
57 stem cell pools, removal of degenerated cells and the generation and functional integration of  
58 new cells through proliferation and differentiation (Guo and Cantley, 2010; Knapp and Tanaka,  
59 2012; Rock and Hogan, 2011; Tu et al., 2016). This plasticity is observed in organs such as  
60 lung, muscle, skin, heart, and liver, but it is most dramatically manifested in the reproductive  
61 system (RS) of many animals. In humans, many organs of the RS are highly plastic in  
62 adulthood and require cyclical regeneration and extensive remodeling (Nair and Taylor, 2010).  
63 For instance, the human endometrium undergoes growth, differentiation and shedding during  
64 every menstrual cycle, a homeostatic process that requires the coordination of proliferation  
65 and differentiation of epithelial progenitor and mesenchymal/stromal stem cells with estrogen  
66 and progesterone fluctuations during the estrus cycle (Gargett et al., 2012).

67

68 Although it is well-established that nuclear hormone receptors (NHRs) for androgen  
69 (Yeh et al., 2002), progesterone (Chappell et al., 1997) and estrogen (Walker and Korach,  
70 2004) are essential for RS development and function, precisely how the endocrine system  
71 affects the stem cell populations responsible for the maintenance and cyclical regeneration of  
72 adult RS organs remains incompletely understood. For example, the precise location and  
73 types of both myometrial and endometrial stem cells chiefly responsible for the 500- to 1,000-  
74 fold increase in volume and 24-fold increase in weight of the human uterus have yet to be fully  
75 determined (Kørbling and Estrov, 2003; Ono et al., 2008; Ramsey, 1994; Shynlova et al.,

76 2006). However, the deep evolutionary conservation of endocrine regulation of the RS has  
77 allowed research organisms such as fruitflies and nematodes to shed light on some of the  
78 roles lipophilic hormones play in the regulation of germ cells, and the embryonic development  
79 of reproductive organs (Allen and Spradling, 2008; Asahina et al., 2000; Gissendanner et al.,  
80 2004; Gissendanner et al., 2008; Sun and Spradling, 2013).

81

82 Lipid metabolism also plays an evolutionarily conserved role during RS embryonic  
83 development and fertility (Barton et al., 2016; Sano et al., 2005). Cholesterol and  $\beta$ -oxidation of  
84 fatty acids are essential for meiosis, embryo development, and uterus function in both mice  
85 and humans (Downs et al., 2009; Dunning et al., 2010; Mouzat et al., 2013; Seli et al., 2014).  
86 In *D. melanogaster*, female feeding behavior, lipid accumulation in the oocyte, and diet nutrient  
87 coordination, lipid metabolism and oocyte development are controlled by the Ecdysone  
88 receptor (EcR) (Sieber and Spradling, 2015). And in *Caenorhabditis elegans*, fatty acids and  
89 their derivatives not only influence reproductive growth and fertilization (Tang and Han, 2017;  
90 Wang et al., 2015; Zhu and Han, 2014), but also regulate germ cell fate via Acyl CoA  
91 synthetase and its downstream product Myristoyl-CoA (Tang and Han, 2017).

92

93 The fundamental importance of lipophilic hormones and their receptors on sexual  
94 reproduction is underscored by the effect metabolism has on endocrine functions. When  
95 systemic metabolism fails due to either disease or aging (Conboy and Rando, 2005; Lopez-  
96 Otin et al., 2016), both germ and somatic cells in the RS gradually degenerate in both men and  
97 women (Makabe et al., 1998; Motta et al., 2002; Paniagua et al., 1991). Changes in fat and  
98 energy storage in the body have been shown to affect the reproductive activity of many

99 vertebrates (Ballinger, 1977; Eliassen and Vahl, 1982; Reznick and Braun, 1987). Similarly,  
100 the adult females of *D. melanogaster* can remodel their midgut to adjust the energy balance  
101 between the body and the RS after mating (Reiff et al., 2015) and in *C. elegans* dietary  
102 restriction has been shown to delay aging related degeneration of the egg-laying apparatus  
103 (Pickett and Kornfeld, 2013). Conversely, age-related and disease-induced changes in RS  
104 metabolism also feed back to the metabolic homeostasis of the body. For example,  
105 menopause alters lipid metabolism in adipose tissue causing atopic lipid accumulation in liver,  
106 macrophages, and the cardiovascular system (Della Torre et al., 2014); and diseases of the  
107 RS, such as polycystic ovary syndrome, are often associated with metabolic ailments such as  
108 nonalcoholic fatty liver disease (Della Torre et al., 2014).

109

110 While the evolutionarily conserved roles for NHR and lipid metabolism in RS embryonic  
111 development and germ stem cell functions are well established, their precise role in regulating  
112 somatic stem and progenitor cell functions during adult RS maintenance and regeneration  
113 remains an open question. The recent discovery that the nuclear hormone receptor *nhr-1* is  
114 required for the post-embryonic development of the hermaphroditic RS in the freshwater  
115 planarian *Schmidtea mediterranea* (Tharp et al., 2014), has made this organism an attractive  
116 system to study the roles that NHRs and lipid metabolism may play in the plasticity of the RS.  
117 Unlike other invertebrate research organisms (*i.e.*, fruitflies and nematodes), planarians are  
118 devoid of both gonads and attendant somatic organs and tissues of the RS upon birth. As  
119 animals grow, the entire RS, including the germline, arises from the proliferation and  
120 differentiation of adult stem cells known as neoblasts (Newmark et al., 2008). Once established,  
121 the RS may be subjected to changes related to either injury and/or nutritional intake. If an

122 animal is amputated, the resulting fragments resorb their RS as they regenerate the missing  
123 body parts. A similar resorption of the RS is also observed when the animals are subjected to  
124 starvation. In both cases, once food becomes available, the animals regenerate a fully  
125 functional RS (Guo et al., 2016; Newmark and Sanchez Alvarado, 2002).

126

127 Numerous evolutionarily conserved genes and pathways have also been shown to  
128 regulate RS development, homeostasis and regeneration in *S. mediterranea* (Chong et al.,  
129 2013; Guo et al., 2016; Iyer et al., 2016a; Newmark and Sanchez Alvarado, 2002; Newmark et  
130 al., 2008). For instance, *Dmd1*, one the most conserved genes in male sex determination  
131 across bilaterians, is essential for the maintenance of the planarian male RS, including germ  
132 stem cell specification, and differentiation (Chong et al., 2013). *nanos*, the nuclear factor Y-B  
133 (*NF-YB*), *Smed-boule2* and several azoospermia (DAZ) family members are also required for  
134 germ stem cell maintenance (Iyer et al., 2016a; Iyer et al., 2016b; Wang et al., 2010; Wang et  
135 al., 2007). And *Smed-boule1*, homologs of vertebrate DAZ-associated proteins, synaptonemal  
136 complex protein 1 (SYCP1), *Smed-CPEB*, *Smed-eIF4E-like* and t-complex proteins have all  
137 been shown to be essential for meiosis in testis (Iyer et al., 2016b; Rouhana et al., 2017; Xiang  
138 et al., 2014). Moreover, the size of testes and sperm maturation are determined by the  
139 neuropeptide, NPY-8, and its upstream prohormone convertase, *PC2* (Collins et al., 2010),  
140 and depletion of insulin-like peptide or insulin receptor have been shown to affect  
141 spermatogenesis (Miller and Newmark, 2012). Therefore, *S. mediterranea*, an animal in which  
142 the molecular and cellular interactions underpinning the maintenance and regeneration of the  
143 RS can be mechanistically dissected, provides unique opportunities to advance our  
144 understanding of reproductive biology.

145

146 Here, we exploit the biology, evolutionary conservation of regulatory networks and the  
147 functional genomic tools available in *S. mediterranea* to uncover molecular mechanisms  
148 driving the maintenance and regeneration of the RS. We carried out a discrete RNA mediated  
149 genetic interference (RNAi) screen of genes found to be preferentially expressed in sexually  
150 mature animals, and found new specific functions in the maintenance and regeneration of the  
151 planarian hermaphroditic RS for the previously identified NHR *nhr-1* (Tharp et al., 2014). We  
152 report that *nhr-1(RNAi)* not only resulted in the gradual degeneration and complete loss of the  
153 hermaphroditic RS, but also in the significant downregulation of a cohort of novel reproductive  
154 accessory gland markers and a large set of genes associated with lipid metabolism. We  
155 discovered that the planarian gene *Smed-accs-1*, a homologue of Acyl-CoA synthetase (ACS),  
156 is indispensable for the development, maintenance and regeneration of RS organs and  
157 tissues, but not for the homeostasis or regeneration of other somatic tissues. Remarkably,  
158 supplementing *nhr-1(RNAi)* animals with either bacterial ACS or the lipid metabolite Acetyl-  
159 CoA rescued the phenotype restoring the maintenance and function of the hermaphroditic RS.  
160 Our findings not only demonstrate that the planarian RS depends on an NHR/lipid metabolism  
161 axis for its maintenance and regeneration, but also may have uncovered a conserved  
162 molecular mechanism regulating reproductive capacity in long-lived organisms.

163

## 164 **RESULTS**

165

166 ***nhr-1* is required for the homeostatic maintenance of adult sexual reproductive organs**

167

168 We sought to identify genes important for the maintenance and regeneration of the RS in *S.*  
169 *mediterranea* by comparing the transcriptomes of decapitated sexually mature animals to  
170 immature juveniles. 7,154 transcripts (7.89% Figure 1A) were found to be highly expressed in  
171 sexually mature animals. We prioritized for study genes with coiled-coil domains or zinc finger  
172 domains (n=34), because proteins with these domains are among the most commonly  
173 associated with biological functions in meiosis, hormonal response, and RS development in  
174 eukaryotic organisms (Lupas and Bassler, 2017; Razin et al., 2012; Truebestein and Leonard,  
175 2016). Whole mount *in situ* hybridizations confirmed that 30 genes were expressed in the  
176 gonads (88.2%, Figure S1A and S1B), and 10 genes (29.4%, Figure S1A and S1B) were  
177 expressed in the accessory reproductive organs. Only 2 genes (5.9% Fig S1A and S1B) did  
178 not have detectable expression in the RS. The high levels of expression of genes coding for  
179 proteins with coiled-coil or zinc finger domains in RS suggested that these proteins may be  
180 important for RS functions.

181

182 Next, we tested the functions of the identified genes in sexually mature animals by  
183 RNAi, followed by DAPI and peanut agglutinin (PNA) staining (Figure 1B). Among the genes  
184 found to be essential for RS maintenance was the recently described nuclear hormone  
185 receptor *nhr-1*, which was shown to be required for the post-embryonic development of the  
186 planarian RS (Tharp et al., 2014). *nhr-1* possesses two zinc finger domains of the C4 class  
187 near its N terminus (PFAM Bit scores 38.0 and 92.6, respectively). We tested the function of  
188 this receptor in the mature RS by subjecting animals to multiple rounds of RNAi treatment  
189 (Figure 1B). Initially, 100% of testes had mature spermatids, but after 4 rounds of treatment  
190 29.4% of testes (5 out of 17) had lost mature spermatids. By 8 rounds of treatment, spermatids



191 could not be detected in 100% of testes assayed (Figure 1C). The accessory reproductive  
192 glands can be detected by PNA staining (Chong et al., 2011) in both dorsal and ventral sides  
193 of sexually mature animals. PNA staining showed that the reproductive glands started to  
194 degenerate after 4 rounds of RNAi feedings and completely disappeared after 8 rounds of  
195 treatment (Figure 1D). Interestingly, while *nhr-1(RNAi)* did not lead to significant changes in  
196 the expression of *nanos* in germ stem cells, even after prolonged RNAi feeding (Figure 1C),  
197 *nhr-1(RNAi)* worms were sterile, and did not lay any egg capsules (Figure S2). Knockdown of  
198 a meiosis specific gene (*sycp1*), or an ovary related gene (*gld*) did not affect fertility (Figure  
199 S2). These results indicate that *nhr-1* is essential for the homeostatic maintenance of  
200 differentiated germ cells and somatic tissues of the RS.

201

### 202 ***nhr-1* is required for the progression of normal meiosis in testes**

203

204 We sought to better characterize the observed defect in male meiosis caused by of *nhr-*  
205 *1(RNAi)*. We quantified the percentage of male germ cells at different stages of meiosis in the  
206 testes of both control and *nhr-1(RNAi)* animals using DAPI and two-photon confocal  
207 microscopy. Multiple testes from the same locations of different animals were imaged from  
208 dorsal surface of testes to the middle of the testes at an approximate depth of 50 $\mu$ m, which  
209 was sufficient to consistently distinguish male germ cells at different meiotic stages based on  
210 their nuclear morphology (Movie-S1). Knocking down *nhr-1* led to decreased germ cells at  
211 pachytene stages and to a reduced number of round spermatids (Movie-S2, Figure S3A). The  
212 distribution of spermatocytes at the pachytene stage was also decreased (Figure 2B). Since  
213 bouquet disruption changes the distribution of prophase cells (Chretien, 2011), we also

214 checked bouquet formation in the spermatocytes (Figures 2A, 2C and S3B). During male  
215 meiosis, the telomeres of all 8 chromosomes cluster at the nuclear envelope in the early  
216 leptotene stage to form a bouquet, which is considered essential for the progression of meiosis  
217 (Figures 2C and S3B)(Chretien, 2011; Xiang et al., 2014). The bouquets persist until the  
218 pachytene stage (Figure 2C). In normal male meiosis, 50% of the spermatocytes at leptotene  
219 stage had bouquets (Figure 2C). Almost 100% of the spermatocytes at zygotene or pachytene  
220 stages formed bouquets (79.2% in zygotene stage and 94% in pachytene stage; Figure 2C). In  
221 *nhr-1 RNAi* animals, even though chromosome condensation at each prophase stages was  
222 similar to regular meiosis, the telomeres were scattered around or clustered in several  
223 locations of the nuclear envelope (Figure 2C). After 6 rounds of *nhr-1(RNAi)* treatment,  
224 spermatocytes at leptotene and zygotene stages had significantly fewer bouquets (33.3% in  
225 leptotene stage, 52.8% in zygotene stage and 84.6% in pachytene stage. For leptotene stage,  
226  $p=0.0034$ ; for zygotene stage  $p<0.0001$ ; for pachytene stage,  $p=0.172$ . Figure 2A). These  
227 results indicate that in the absence of *nhr-1* function, bouquet formation is slowed down but not  
228 blocked in leptotene and zygotene stages. Altogether, the data suggest that *nhr-1* is required  
229 for normal meiosis I progression through mechanisms likely involving either the regulation of  
230 normal bouquet formation or the maintenance of bouquets at the nuclear envelope.

231

### 232 **Expression of known specific marker genes of the RS are affected by *nhr-1(RNAi)***

233

234 *nhr-1* is expressed in most organs of the adult hermaphroditic planarian RS. In order to gain a  
235 better understanding of the dynamics of resorption of the RS after *nhr-1(RNAi)*, we  
236 investigated the expression of known reproductive organ markers during this process. Most

237 *nhr-1*<sup>+</sup> cells in both male and female gonads expressed *gh4*, a germ stem cell and  
238 spermatogonial cell marker (Saber et al., 2016)(Figure S4B and S4D), but the expression of  
239 *nanos* and *nhr-1* did not overlap extensively (Figure S4A and S4C). Given that *nanos* is an  
240 evolutionarily conserved marker for germ stem cells (Wang et al., 2007), this result suggested  
241 that *nhr-1* is expressed in more differentiated states of the germ stem cells. In fact, after 4  
242 rounds of *RNAi* treatment the ovary appeared vacated of cells, including differentiated oocytes,  
243 and by the 6<sup>th</sup> round of *RNAi* feeding the ovaries became undetectable (Figure 2E). Co-  
244 localization of *nhr-1* with *eyesabsent (eya)*, *grn* and *tsp-1*(Figure S4E and S4F) showed that  
245 *nhr-1* is expressed in oviduct, sperm duct and accessory glands, respectively (Chong et al.,  
246 2013; Chong et al., 2011). After 4 rounds of *nhr-1(RNAi)*, *tsp-1* and *grn* showed markedly  
247 reduced expression levels while retaining their overall spatial expression patterns, suggesting  
248 that *nhr-1* may directly maintain gene expression of *tsp-1* and *grn*. After 6 rounds of *RNAi*  
249 feeding, *tsp-1* and *grn* expression became undetectable (Figure 2D). Interestingly, even  
250 though the ovaries became undetectable after the 6<sup>th</sup> round of *RNAi* feeding, the oviduct could  
251 still be labeled by the expression of *eya* (Figure 2E). Additionally, the expression of *eya* in the  
252 brain region persisted even after 11 rounds of *nhr-1 RNAi* feeding (Figure 2E), suggesting that  
253 *nhr-1* likely regulates gene expression specifically in the RS. Altogether, our data indicated that  
254 *nhr-1* may specifically regulate gene expression in the RS, with gene expression in different  
255 RS cells and tissues responding to *nhr-1* loss with different kinetics.

256

257 ***nhr-1* is specific and essential for the regeneration of all reproductive system**  
258 **components**

259

260 To determine whether *nhr-1* may play a role in RS regeneration, we characterized the timing of  
261 *nhr-1* expression along with the re-establishment of the accessory reproductive organs in  
262 regenerating fragments derived from adult, sexually mature planarians. We followed adult  
263 head fragments produced by amputating in the pre-pharyngeal region (Figure 3A, B). These  
264 fragments initially retain ovaries and some anterior reproductive organ tissues but are devoid  
265 of all RS tissues found in the trunk and tail of the animal after amputation (Figure 3A, B). Head  
266 fragments fully regenerate the RS 32 days post amputation (DPA) (Figure 3A). During this  
267 process, *nanos*<sup>+</sup> germ stem cells persist, while differentiated gonad cells disappear soon after  
268 amputation (Wang et al., 2007). Consistent with data from decapitated fragments (Table S1),  
269 detection levels of *nhr-1* expression became sharply reduced after amputation (Figure 3B).  
270 However, its expression became noticeable once again 12 DPA, when a newly regenerated  
271 pharynx could be detected by DAPI staining, and *nanos*<sup>+</sup> cell had already lined up in a pattern  
272 indistinguishable from primordial testes (Figure 3A and 3B). By 12 DPA, *nhr-1* expression was  
273 detected in the center of the regenerating tail, where the future dorsal glands will regenerate  
274 (Figure 3A and 3B). By 22 DPA, *nhr-1*<sup>+</sup> cells formed a circle in this region (Figure 3A and 3B),  
275 and by 28 DPA the marked *nhr-1* expression highlighted the prospective gland structure that  
276 eventually became visible by 32 DPA (Figure 3A and 3B). The gland was established after the  
277 gonad pore formed, which happened in about half of the tested animals by 32 DPA. It is  
278 interesting to note that *nanos*<sup>+</sup> cells started to differentiate 28 DPA, a time when *nhr-1*  
279 expression was abundant at the gland region anlagen. These results suggested that *nhr-1*  
280 expression precedes the establishment of the definitive RS tissues during regeneration.

281

282 We proceeded to determine the function of *nhr-1* in RS regeneration by first subjecting  
283 sexual adult animals to RNAi for 8 times followed by amputation of heads and tails and further  
284 RNAi treatments of these anterior and posterior fragments to chronically sustain *nhr-1* loss of  
285 function (Figure 3C, D). Regeneration of the RS in these fragments was examined 68 DPA. In  
286 the first week of regeneration, *nhr-1 RNAi* fragments formed blastemas that were  
287 indistinguishable from control animals (Figure 3H). While most control animals formed  
288 gonopores by 60 DPA, *nhr-1 RNAi* animals had not developed gonopores by 68 DPA (Figure  
289 S5A). By 68 DPA, control head fragments had regenerated the full set of mature RS organs,  
290 including the copulatory bursa, the bulbar cavity, the penis papilla and testes containing  
291 mature spermatids, while the head *nhr-1(RNAi)* fragments lacked all of these structures  
292 (Figure 3E and 3F). No testis-like structures could be found by DAPI staining on regenerated  
293 *nhr-1(RNAi)* fragments (Figure 3G), and neither testes nor accessory glands could be detected  
294 by the molecular markers *tsp-1* and *plastin* (Figure 3G). We also failed to detect sperm ducts  
295 and oviducts by either DAPI or molecular markers on the ventral side (Figure S5C).  
296 Nevertheless, gut and pharynx regenerated normally in these fragments with *nhr-1* expression  
297 depleted, suggesting the function of this NHR is specific to the RS. Next, we examined the  
298 regenerated heads from *nhr-1(RNAi)* tail fragments (Figure 3D). Consistently, the *nhr-1(RNAi)*  
299 fragments failed to regenerate tissues of the RS including the ovary, oviduct and sperm duct  
300 (Figure 3I), but regenerated photoreceptors (Figure 3G) as well as the cephalic ganglia of the  
301 central nervous system normally (Figure S5B). We conclude from these data that *nhr-1* is  
302 specific and essential for the regeneration of the RS in planarians.

303

304 **Gene expression profiling of *nhr-1(RNAi)* animals revealed both novel genes and**  
305 **metabolic regulators of the RS**

306

307 To better understand how *nhr-1* maintains tissue homeostasis and regulates regeneration of  
308 the RS, we profiled differential gene expression changes between intact sexual adult worms  
309 subjected to *nhr-1(RNAi)* and *unc-22(RNAi)* controls (Figure 4A). As knocking down of *nhr-1*  
310 expression became stronger with increased numbers of RNAi treatments (n=4, 6 and 8), more  
311 genes showed reduced expression levels (Figure 4B). The numbers of genes with reduced  
312 expression increased from 31 after 4 rounds of feeding to 3,604 after 8 rounds of feeding  
313 (Figure 4B). Reported molecular markers of testes, ovaries, and accessory organs were  
314 among the genes displaying decreased expression levels after *nhr-1(RNAi)* (n=134, Figure 4C),  
315 hence validating the quality of our gene set. Expression of molecular markers of germ stem  
316 cells (*i.e.*, *nanos*, *gh4*) were not affected by *nhr-1(RNAi)*, consistent with previous observation  
317 that *nhr-1* is required to maintain differentiated states of germ cells and RS somatic structures  
318 (Figures 1 and 2). Gene Ontology analyses of the gene sets with downregulated expression  
319 after 6 and 8 rounds of RNAi feeding showed an overrepresentation of functions associated  
320 with metabolic processes, especially lipid catabolic process (Figure 4D), including the nutrition  
321 sensor AMPK (Chantranupong et al., 2015), Acyl-coenzyme A catabolism-related genes (Acyl-  
322 coenzyme A thioesterase, Acyl-CoA-binding domain-containing protein, and Acyl-CoA  
323 synthetases) (Tillander et al., 2017), the lipid droplet consuming gene (LPA  
324 acyltransferase)(Leung, 2001; Pol et al., 2014), the cholesterol synthesis gene 3-hydroxy-3-  
325 methylglutaryl-coenzyme A reductase (HMGCR) (Sharpe and Brown, 2013) and the  $\beta$ -  
326 oxidation related genes Acetyl-CoA acetyltransferase, Mitochondrial carnitine/acylcarnitine

327 carrier protein, Peroxisomal carnitine O-octanoyltransferase (Indiveri et al., 2011). Taken  
328 together, these results indicate that *nhr-1* likely regulates the tissue homeostasis and  
329 regeneration of the RS through the activation of genes associated with discrete metabolic  
330 pathways.

331

### 332 ***nhr-1(RNAi)* uncovered novel and specific accessory reproductive organ markers**

333

334 By profiling gene expression changes in *nhr-1(RNAi)* at different times after treatment, we  
335 reasoned that genes reduced their expression levels at the earliest time point (*i.e.*, 4 times of  
336 feeding) could be upstream regulators of different tissues in the RS, or represent tissues that  
337 were affected earliest upon loss of *nhr-1* expression. Interestingly, only 31 genes reduced their  
338 expression levels after 4 rounds of *nhr-1 RNAi* feedings (Figure 4B), a time when visible  
339 changes in the RS were observed in the testes and reproductive glands (Figure 1 and 2). No  
340 gene increased at this time point. Among those decreased genes, the expression patterns in  
341 the RS were only known for two genes, *tetraspanin 66e* and *PL04022B1F07*(Rouhana et al.,  
342 2017). 23 genes were planarian specific, *i.e.*, devoid of obvious homologs in other species. 6  
343 genes were homologous to metabolism-related genes, such as Sodium/potassium-transporting  
344 ATPase subunit beta-1, Ectonucleoside triphosphate diphosphohydrolase 5 and ACS  
345 (Grevengoed et al., 2014; Lingrel et al., 2003; Read et al., 2009). Importantly, all 31 genes  
346 have higher expression levels in sexual adult animals, compared to juvenile animals or the  
347 asexual line, CIW4. Notably, expression of 30 genes decreased in the first week after  
348 amputation (Figure S6C and Table S2). Thus, we hypothesize that this cohort of 31 genes are  
349 likely to include specific regulators of different tissue types in the RS.

350

351 We successfully cloned the 30 genes identified and examined their expression patterns  
352 by whole mount *in situ* hybridization (WISH) (Figure S6A). Consistent with previous  
353 observation with PNA staining that the reproductive glands were affected after 4 rounds of *nhr-*  
354 *1* RNAi (Figure 1), we found 23 genes expressed in the posterior reproductive glands.  
355 Additionally, 7 genes were expressed in the testes, 4 genes were expressed in the ovaries, 2  
356 genes were expressed in the yolk glands and 1 gene was expressed in the oviduct (Figure  
357 S6A). Hence, testes, ovaries, reproductive glands and yolk glands were among those tissues  
358 in the RS that were among the earliest affected by loss of *nhr-1* expression. These results  
359 reinforce the function that the NHR encoded by *nhr-1* may play a role in activating downstream  
360 genes in a cell-autonomous way.

361

### 362 **Novel markers help refine the anatomical description of posterior accessory** 363 **reproductive glands**

364

365 Next, we took advantage of the expanded cohort of markers for the reproductive glands  
366 uncovered by the transcriptome analyses (n=19) to study the cell type complexity and fine  
367 spatial organization of the posterior reproductive glands. We used fluorescent whole mount *in*  
368 *situ* hybridization (FISH) to dissect the expression patterns of the markers and their relative  
369 spatial relationships. From single-gene and multi-gene FISH experiments, we found that gland  
370 cells have different distribution patterns on dorsal and ventral sides of the tails. Most gland  
371 cells are distributed as circles surrounding the copulatory apparatus. Different markers labeled  
372 different gland cells which showed distinct distribution domains. We found the expression of



373 the novel gland markers in both dorsal and ventral posterior regions. Based on their  
374 expression patterns, we defined dorsal and ventral gland areas and subdivided each of these  
375 into 5 spatially-defined regions (Figure 5A and K).

376

377 The 19 gland markers subdivided the dorsal gland area into 5 discrete regions which  
378 allowed us to name the novel genes after their detected spatial location. Region 1 was defined  
379 by the *dorsal inner gland 1 and 2* genes (*dig-1* and *dig-2*) and *tetraspanin-66e*, which were  
380 expressed in the dorsal regions lateral to the bursa canal (Figure 5B and Figure S7A). *dig-1*  
381 co-localized with *tetraspanin-66e* in the exterior part of the *tetraspanin-66e*<sup>+</sup> domain (Figure  
382 5F), while *dig-2* co-localized with *tetraspanin-66e* in the anterior part of the *tetraspanin-66e*<sup>+</sup>  
383 domain (Figure S7A). Region 2 was defined by the *dorsal middle gland* genes 1 through 10  
384 (*dmg-1* to *dmg-10*) and *PL04022B1F07*, all of which were expressed in more exterior circles  
385 relative to *dig-1* and *-2* and *tetraspanin-66e*. Gland cells in Region 2 marked by these genes  
386 were distributed around the testes, dorsal and ventral to the bursa canal (Figure 5A). *dmg-1*  
387 and *PL04022B1F07* were co-expressed in the same gland cells, while *dmg-2* was expressed  
388 in a broader domain (Figure 5D and 5H). *dmg-3* was expressed in a smaller, distinct domain  
389 that does not overlap with *PL04022B1F07* expression (Figure 5E and 5I). *dmg-4* and *dmg-5*  
390 were expressed in the same cells, which were different from those cells expressing *dmg-6*  
391 (Figure S7B and S7F). *dmg-7* and *dmg-8* were co-expressed in the same cells (Figure S7C and  
392 S7G). Region 3 was defined by the *dorsal posterior gland 1* gene (*dpg-1*), which was  
393 expressed in a small number of gland cells posterior to the bursa canal (Figure 5A, 5C, 5G and  
394 Figure S6A). Region 4 was determined by the *interstitial gland* genes (*igg-1*, *-2* and *-3*), which  
395 were robustly expressed in a very broad domain wrapping around the posterior testes (Figure

396 5A). *igg-1* showed partial colocalization with *dmg-3*, but not *PL04022B1F07* (Figure 5E and 5I),  
397 while *igg-2* labeled the more exterior part of the *igg-3* domain (Figure S7D and S7H). Region 5  
398 was specified by one gene which we named *tsp-1-like* (i.e., *tsp-1-l*) as it is expressed in similar  
399 domains as *tsp-1* (Figure S6A). Interestingly, neither *dpg-1*, nor *igg-1* overlapped with *tsp-1*,  
400 which was widely expressed in the dorsal reproductive gland (Figure 5C and 5G, Figure S7E).

401

402 The anatomical distribution of the reproductive glands in the ventral side of the worm  
403 could likewise be divided into 5 regions according to the spatial expression pattern of the  
404 above described genes. Ventral Region 1 was defined by *dig-1*, *tetraspanin-66e* and *dmg-3*  
405 which were expressed in the gland next to the penis papilla, including 1-2 layers of cells  
406 located in front of this gland (Figure 5K, L and S7K), with *dig-1* expressed in the exterior part of  
407 *tetraspanin-66e*<sup>+</sup> cells (Figure 5P). Ventral Region 2 was characterized by the expression  
408 patterns of *dmg-1*, *PL04022B1F07*, *dmg-2* and *igg-2* in the gland close to the end of the  
409 seminal vesicles (Figure 5N and S7I). Similar to their expression in the dorsal side, *dmg-1* and  
410 *PL04022B1F07* were expressed in the same gland cells, while *dmg-2* was expressed in more  
411 peripheral cells (Figure 5N and 5R). Ventral Region 3 was defined by 7 transcripts expressed  
412 around the copulatory apparatus (Figure 5K, O and S7J). Unlike the dorsal side, *dmg-4* and  
413 *dmg-6* were likely expressed in the same gland cells, while *dmg-5* was expressed in different  
414 cells (Figure 5O, S). *dmg-7* and *dmg-8* were likely expressed in the same gland cells (S7J, M).  
415 The fourth ventral or cement gland region was defined by *dig-2*, *igg-1* and *tsp-1-l* expression  
416 (Figure 5K and 5M). We found that the majority of the *dig-2*<sup>+</sup> cells did not express *igg-1* (Figure  
417 5Q), and that *igg-1* was not expressed in *tsp-1*<sup>+</sup> cells (Figure S7L). *igg-3* and *dpg-1* were not  
418 detected in the ventral region (Figure S7I for *igg-3*).

419

420 Consistent with the transcriptome analyses (Figure 4B), expression in adult animals of  
421 these 30 transcripts decreased after four *nhr-1(RNAi)* treatments (Fig 5J, T, U and S8). The  
422 expression of *dig-1* in the gland region decreased, while its expression on the testes did not  
423 show appreciable changes (Fig 5J, T). This suggested that *dig-1* expression in the gland is  
424 likely to be specifically regulated by *nhr-1*. *dig-11*, *dig-2*, *tetraspanin-66e*, *dmg-6*, *dmg-8*, *igg-2*  
425 and *igg-3* also changed their expression patterns after *nhr-1(RNAi)* (Figures 5J, T, U, and S8A,  
426 E, F and C). In the dorsal regions, expression of both *tetraspanin-66e* and *dig-2* extended to  
427 the dorsal middle region (Fig S8A), while *dmg-8*, *igg-2* and *igg-3* expanded their expression to  
428 the inner region (Figure 5J and S8C). In the ventral side, *dig-1* and *tetraspanin-66e* extend to  
429 the region around the end of seminal vesicles (Fig 5T), while the expression of *dmg-6* and  
430 *dmg-8* were now detected in the central region (Figure 5U and S8F). These data suggest that  
431 *nhr-1* is not only essential for the development and regeneration of the RS, but also for  
432 regulating anatomical expression domains of the accessory reproductive organs.

433

#### 434 ***Smed-acs-1* is essential for development, maintenance and regeneration of the RS**

435

436 To determine the functions of the 30 genes responding earliest to loss of *nhr-1* expression, we  
437 carried out RNAi screening in sexual adults and examined for defects in the RS. Of these, we  
438 focused on the planarian homolog of Acyl-CoA synthetase *Smed-acs-1*, as we were struck to  
439 find out that its silencing by RNAi phenocopied the defects observed for *nhr-1(RNAi)*. PNA  
440 staining showed that both dorsal and ventral glands degenerated after 6 rounds of *acs-1(RNAi)*  
441 treatments. After 9 rounds of RNAi, the glands became undetectable (Figure 6A).

442 Degeneration or loss of other tissues in the RS, including the penis papilla, testes, ovaries and  
443 oviduct were also evident (Figure 6B). Moreover, the treated worms stopped laying egg  
444 capsules after *acs-1(RNAi)* treatments.

445

446 *acs-1* also shared similar expression dynamics and functions with *nhr-1* during  
447 development and regeneration of the RS. *acs-1* expression increased during sexual maturation  
448 and decreased after amputation (Figure S9A). Remarkably, body growth and somatic tissue  
449 regeneration were not influenced by *Smed-acs-1(RNAi)* in hatchlings and regeneration  
450 fragments; however, the reproductive accessory glands were not detectable in both conditions  
451 (Figure 6C). The penis papilla and gonopore neither developed, nor regenerated in the *Smed-*  
452 *acs-1(RNAi)* animals (Figure 6C). Similarly, neither the ovaries nor the oviduct developed or  
453 regenerated (Figure 6D). Interestingly, the testes both developed and were regenerated after  
454 amputation, but failed to produce mature spermatozoa (Figure 6C and 6D). We conclude from  
455 these results that *acs-1*, like *nhr-1*, is essential for both RS development and regeneration.

456

457 The identified planarian *acs-1* is a homolog of ACS, which is known to be important in  
458 fatty acid metabolism (Ellis et al., 2010). *acs-1* codes for a protein containing an AMP-  
459 forming/AMP-acid ligase II domain at its N-terminus and phosphopantetheine attachment sites  
460 at its C-terminus. The deduced *Smed-ACS-1* protein sequence in sexual and asexual  
461 planarian share 99.0% identity, yet when compared to sexual animals, the expression of  
462 *Smed-acs-1* is higher in sexual than in asexual planarians (Figure S9A). Unlike *nhr-1*, *acs-1*  
463 expression is restricted to comparatively smaller RS domains. *acs-1* is expressed around the  
464 testes region of the planarian dorsal side (Figure S9B and S9C) and in the ovary and yolk

465 gland cells on the ventral side (Figure S9B and S9D). These data indicate that *acs-1* function  
466 has been restricted to sexual organs and suggest that *acs-1* may regulate RS functions non-  
467 cell autonomously.

468

### 469 ***nhr-1* regulates reproductive system maintenance through lipid metabolism**

470

471 Given that genes regulating lipid metabolism decreased their expression after *nhr-1(RNAi)*,  
472 and that ACS is important for fatty acid uptake, we tested whether *nhr-1* or *acs-1* regulated the  
473 RS by modulating lipid metabolism. We first assayed dietary lipid accumulation in sexually  
474 mature planarians using Oil Red O staining. Lipid droplets were quantified 7 days after feeding  
475 animals with liver (Material and Methods). Well-fed wild type and *unc-22(RNAi)* animals rarely,  
476 if at all, accumulated detectable amounts of lipids (Figure 7A, B), suggesting that under normal  
477 conditions planarians efficiently uptake and metabolize dietary lipids. In contrast, animals  
478 treated with either repeated rounds of *nhr-1(RNAi)* or *acs-1(RNAi)* displayed readily detectable  
479 lipid accumulation in the form of lipid droplets (Figure 7A, C), with the most notable  
480 accumulation being observed in the areas around the intestine and testes (Figure 7B, D).  
481 Interestingly, neither *nhr-1(RNAi)*, nor *acs-1(RNAi)*, had measurable effects on lipid  
482 accumulation in asexual worms (Figure S10A). Thus, we conclude from these data that both  
483 *nhr-1* and *Smed-acs-1* are essential for lipid accumulation specifically in sexual adult  
484 planarians.

485

486 Because Acyl-CoA Synthetase is a critical enzyme for fatty acid activation (Ellis et al.,  
487 2010), we attempted to rescue the RS by restoring Acyl-CoA Synthetase or lipid metabolites in

488 the sexual adults fed with *nhr-1(RNAi)* food. Fatty acid can be converted by the Acyl-CoA  
489 Synthetase *in vitro* (Knoll et al., 1994). Planarian RNAi food is a homogenate of beef liver and  
490 bacteria, which together with free fatty acids from planarian tissues may offer the substrates for  
491 fatty acid conversion. After feeding adult worms with *nhr-1(RNAi)* food for 4 weeks, the Acyl-  
492 CoA Synthetase from *Pseudomonas* was added to the RNAi feeding schedule for the  
493 remaining 6 weeks of the experiment. After 10 weeks of *nhr-1(RNAi)* treatment without Acyl-  
494 CoA Synthetase supplementation, adult animals lost their testes and accessory reproductive  
495 glands as before (7 out of 8) (Figure 7E and S10B). Remarkably, the animals supplemented  
496 with Acyl-CoA Synthetase retained their testes (Figure S10B) and gland cells (Figure S10D)  
497 indicating that addition of this enzyme was sufficient to rescue the loss of the RS in *nhr-*  
498 *1(RNAi)*-treated animals (n=7 out of 7). Additionally, after long-term *nhr-1(RNAi)* feedings,  
499 clusters of germ stem cells, spermatogonia and other meiotic cells were not detectable by  
500 either *gh4* or *plastin* staining (Figure 7F and 7G). However, clusters of *gh4*<sup>+</sup> and *plastin*<sup>+</sup> cells  
501 were restored after *nhr-1(RNAi)* was provided (Figure 7F and 7G), which suggested that Acyl-  
502 CoA Synthetase rescued both the proliferation and differentiation of germ stem cells in the  
503 absence of *nhr-1* function. To further evaluate this discovery, we asked if the *nhr-1(RNAi)* RS  
504 phenotypes could be rescued by the exogenous addition of the metabolite Acetyl-CoA, which  
505 is made by Acyl-CoA Synthetase and has been shown to be taken up from the extracellular  
506 space by transporters (Pietrocola et al., 2015). We fed or injected Acetyl-CoA to *nhr-1(RNAi)*  
507 animals and the results were consistent with Acyl-CoA Synthetase feeding, with 5 out of 8  
508 animals displaying rescue of the phenotype as illustrated by the recovery of *tsp-1 expression* in  
509 dorsal gland cells and of *plastin* and *gh4* cells in the dorsal testes region (Figure 7E, S10B and  
510 S10C). Taken together, increasing an enzyme or exogenously providing a metabolite essential

511 for lipid metabolism was sufficient in both cases to rescue the RS defects caused by *nhr-*  
512 *1(RNAi)* in planarians. These results demonstrated that *nhr-1* likely regulates RS maintenance  
513 and regeneration via an Acyl-CoA Synthetase-activated lipid uptake process.

514

## 515 **DISCUSSION**

516

517 We have shown that both male and female RS components of the planarian *S. mediterranea*  
518 are actively maintained by the nuclear hormone receptor *nhr-1* and its downstream target *acs-*  
519 *1* through lipid metabolic pathways (Figure 7H). In many organisms, including humans, the  
520 energetic costs associated with reproduction are considerable and rely in great measure on fat  
521 metabolism, the major source of energy in animals (Bronson, 1989; Valencak et al., 2009;  
522 Wang et al., 2008). In planarians, *nhr-1* activates lipid metabolic genes in sexually mature  
523 animals (Figure 4D), including a gene homologous to Acyl-CoA Synthetase (*Smed-acs-1*).  
524 During the reproduction of many animals, fat reserves are mobilized, but reducing or  
525 abolishing reproduction increases lipid storage in many species (Corona et al., 2009; Judd et  
526 al., 2011). Dietary lipids are converted to Acyl-CoAs by Acyl-CoA Synthetase, a role likely  
527 played by *Smed-acs-1* in the RS of planarians, where their  $\beta$ -oxidation yields Acetyl-CoA to  
528 fuel both reproduction and the lifelong maintenance of the RS. Without *nhr-1*, the expression of  
529 *acs-1* is inhibited. Free lipids fail to be taken up by the RS and accumulate in the body,  
530 followed by dramatic hypogonadism and the general resorption of all accessory reproductive  
531 glands in planarians (Figure 7H). Our study, therefore, has uncovered a reproductive-  
532 endocrine signaling axis causally linked to dietary lipid metabolism.

533

534 **Lipid metabolism plays a critical role in RS maintenance and regeneration**

535

536 The insulin and neuroendocrine pathways have been previously shown to be required for  
537 sexual maturation and germ cell differentiation in planarians. In *S. mediterranea*, the insulin  
538 pathway is activated by insulin like pheromone (*ilp-1*) through its receptor (*inr-1*), and  
539 influences both body size and reproductive organs (Miller and Newmark, 2012). The  
540 neuroendocrine pathway involves the neuropeptide NPY-8 and its cognate G protein-coupled  
541 receptor NPYR-1, and their knockdown results in the loss of differentiated germ cells and  
542 sexual maturity (Saber et al., 2016). Although the insulin and lipid metabolism pathways are  
543 known to crosstalk in other species, the lipid metabolic processes regulated by *nhr-1* are likely  
544 independent of the insulin pathway. Even though *ilp-1* expression decreased after 6 rounds of  
545 *nhr-1(RNAi)* treatment, neither *nhr-1*, nor *Smed-acs-1*, influenced body size even after 12  
546 feedings. Similarly, *nhr-1* does not respond to NPY8, suggesting that *nhr-1* is likely not part of  
547 the neuropeptide pathway, an observation supported by the fact that NPYR-1 is the receptor of  
548 NPY-8. Moreover, neither the insulin, nor the neuropeptide pathway-related genes altered their  
549 expression after *nhr-1(RNAi)*. These data suggest that the lipid metabolism regulated by *nhr-1*  
550 is a third and novel pathway that plays a critical role in the reproductive system of *S.*  
551 *mediterranea*.

552

553 *nhr-1*, its putative target *acs-1* and the downstream lipid metabolic genes and  
554 metabolites may also have conserved roles in other species of the Lophotrochozoa. In  
555 planarian *Dugesia ryukyuensis*, yolk gland regeneration is inhibited by excess 17 $\beta$ -estradiol  
556 (Miyashita et al., 2011), which is a lipid catabolite (Wollam and Antebi, 2011) and a key



557 regulator of lipid metabolism (Sieber and Spradling, 2015). Also, the hydrophobic fraction of  
558 tissue homogenates from the planarian *Polycelis nigra* is known to induce the sexual state in  
559 the asexual *Dugesia gonocephala sensu lato* (Grasso et al., 1975), which suggests that lipid  
560 and its metabolites are important for the sexual maturation and reproduction. In *Schistosoma*  
561 *mansoni*, fatty acid oxidation and acyl-CoA synthetase are required for egg production (Huang  
562 et al., 2012). Both *nhr-1* and *Smed-acs-1* have conserved homologs in other free-living and  
563 parasitic platyhelminthes. Our work suggests that antagonists to *nhr-1* and/or *Smed-acs-1* may  
564 repress sexual reproduction in the Lophotrochozoa by desexualization and thus may be useful  
565 drug targets for parasitic control.

566

#### 567 ***nhr-1* is required for lipid metabolism in the planarian reproductive organs**

568

569 *nhr-1* likely directs the expression of multiple downstream genes. The protein encoded  
570 by *nhr-1* has two conserved nuclear hormone receptor DNA binding domains in the N terminal  
571 and one ligand binding domain in the C terminal. After *nhr-1(RNAi)*, the majority of affected  
572 genes showed significantly downregulated expression suggesting that *nhr-1* mostly activates  
573 gene transcription. In fact, the expression of only 31 genes appeared to be significantly  
574 affected when defects were first observed during the early stages of *nhr-1(RNAi)* treatment.  
575 Most of these genes were predominantly expressed in the dorsal and ventral glands around  
576 the copulatory organs (Figure 5). *nhr-1* is a lophotrochozoan-specific nuclear receptor (Tharp  
577 et al., 2014), but a homologue to the retinoid-related orphan receptor  $\beta$  (ROR $\beta$ ). Members of  
578 the ROR family of receptors such as ROR $\gamma$ t can be activated by oxysterols, which are  
579 cholesterol derivatives produced during lipid metabolism (Soroosh et al., 2014). Given the low

580 levels of *nhr-1* and *acs-1* expression in the asexually reproducing planarians, and that glands  
581 are important organs for sterol synthesis (Kurzchalia and Ward, 2003; Niwa and Niwa, 2016;  
582 Wollam and Antebi, 2011), we speculate that a likely source of the unknown ligand for *nhr-1*  
583 may originate from the accessory gland organs of the RS. Because *nhr-1* expression is  
584 dramatically decreased after amputation and reactivated during RS regeneration a future  
585 comparison of the metabolome between these two stages may help identify the ligands for *nhr-*  
586 *1*.

587

## 588 **A reproductive-endocrine signaling axis is required for the maintenance and** 589 **regeneration of the RS**

590

591 Our data indicate that *nhr-1* triggers conserved lipid metabolism pathways to maintain  
592 the planarian RS. Depletion of *nhr-1* expression during homeostasis decreased the expression  
593 levels of lipopolysaccharide and other downstream putative target genes, such as tumour  
594 necrosis factor (TNF) $\alpha$  and interleukin (IL), which are known to initiate liver regeneration after  
595 partial hepatectomy(Taub, 2004). Additionally, our studies revealed a downregulation of  
596 *caveolin* and *HMGCR* gene expression after *nhr-1(RNAi)*, both of which are also involved in  
597 lipid metabolism and are essential for liver regeneration (Delgado-Coello et al., 2011;  
598 Fernandez et al., 2006; Gazit et al., 2010; Trentalance et al., 1984). Additionally, recent work  
599 has showed that intestine regeneration is also be boosted by dietary lipid(Beyaz et al., 2016).  
600 Thus, the molecular pathway of RS regeneration, which is triggered by *nhr-1* and regulated by  
601 *Smed-acs-1*, may function in different organs. Altogether, we take these data to suggest that  
602 the NHR-dependent regeneration of the RS may not be a unique feature of this system and

603 that other organ-endocrine axes may exist that are mediated by other not yet characterized  
604 NHRs encoded by the *S. mediterranea* genome.

605  
606 ***Smed-acs-1* specifically regulates lipid metabolism in RS**

607  
608 ACS can convert fatty acids to different products, which may have different metabolic  
609 fates in different tissues (Grevengoed et al., 2014). In vertebrates, long ACS isoform 4  
610 (ACSL4), fatty acid transport protein 3 (FATP3), ACS bubblegum 1 (ACSBg1) and ACS  
611 bubblegum 2 (ACSBg2) are enriched in the RS, producing different types of Acyl-CoAs  
612 (Grevengoed et al., 2014). Though defects in brain were observed in ACSL4 and ACSBg  
613 mutants, defects in the RS were not reported in animals lacking a single ACS (Grevengoed et  
614 al., 2014), suggesting that different organs may depend on specific metabolites for their normal  
615 function. Given the very specific expression patterns of *acs-1* in the adult planarian, it is likely  
616 that *acs-1* may be non-cell autonomously regulating the maintenance and regeneration of the  
617 planarian RS. Based on gene expression, the most likely tissues endowed with high ACS-1  
618 activity are the ends of gut branches, the exterior of the lobes of testes, yolk glands and glands  
619 surrounding the ovaries. These cell types may convert dietary lipids from the intestine and  
620 transport the Acyl-CoAs to other tissues of the RS. That such transport of metabolites likely  
621 exists in planarians is supported by the rescue experiments in which we fed either bacterial  
622 ACS or Acetyl-CoA to *nhr-1(RNAi)*-treated animals (Figure 7). In fact, the rescue of the defects  
623 in the RS in *nhr-1(RNAi)* planarians by exogenously administered bacterial ACS, suggests that  
624 planarian RS may not necessarily rely on a single kind of Acyl-CoAs.

625

626 Because ACS protein and Acetyl-CoA could rescue defects in the RS after *nhr-1(RNAi)*,  
627 we suspect that the AMPK and Acetyl-CoA synthesis pathways in both mitochondria and  
628 cytosol may be controlled by *acs-1* in the planarian RS. After fatty acid is converted to Acyl-  
629 CoAs by ACS in the cytosol, Acyl-CoAs can be transported by mitochondrial  
630 carnitine/acylcarnitine carrier protein (SLC25A20) to synthesize Acetyl-CoA to be used by the  
631 TCA cycle to generate ATP. Alternatively, Acyl-CoAs can be used directly in the cytosol to  
632 produce Acetyl-CoA, which is further used to generate sterols by HMGCR (Pietrocola et al.,  
633 2015). After 6 to 8 feedings of *nhr-1(RNAi)*, the expression of key molecules involved in Acetyl-  
634 CoA generation and consumption in both mitochondria and cytosol decreased significantly  
635 (Figure 4). AMPK expression also decreased after 6 rounds of *nhr-1(RNAi)*. AMPK can be  
636 activated by fatty acid and modulate meiosis in the gonads of *Drosophila*, *C. elegans* and mice  
637 (Bertoldo et al., 2015; Ellis et al., 2010). Given that *acs-1(RNAi)* phenocopies the RS  
638 defects of *nhr-1(RNAi)*, it is likely that AMPK may be a downstream target of *acs-1* to regulate  
639 planarian gonad functions.

#### 640 641 **Implications for reproduction, fat metabolism and lifespan**

642  
643 In many organisms, increased life span is associated with reduced reproduction, but drastically  
644 increased lipid storage and generally improved survival under starvation conditions (Rion and  
645 Kawecki, 2007; Tatar et al., 2001). As such, it has been postulated that lipids set aside for  
646 reproduction are unavailable to support the maintenance and survival of other somatic tissues,  
647 ultimately diminishing the life-span of the organism (Shanley and Kirkwood, 2000). This  
648 tradeoff between reproduction and the homeostasis of other somatic functions has led to the

649 notion that individuals with curtailed reproduction survive better and live longer than those with  
650 higher reproductive output and vice versa (Partridge et al., 2005; Reznick et al., 2000). Yet,  
651 how reproduction, fat metabolism, and life span may or may not be mechanistically intertwined  
652 remains poorly understood (Hansen et al., 2013). The findings reported here indicate that  
653 planarians may provide a novel biological context in which to unravel this issue.

654

655 Unlike the most actively researched organisms used to study reproduction, lipid metabolism  
656 and aging (*i.e.*, flies, nematodes and vertebrates), planarians are negligibly senescent and can  
657 lose and regenerate their entire RS seemingly endlessly. When either starved or amputated,  
658 the hermaphroditic sexual organs are resorbed likely due to loss of *nhr-1* signaling, only to be  
659 restored once food is available, the animals reach an appropriate size (Newmark and Sanchez  
660 Alvarado, 2002), and lipid metabolism is once again activated to maintain the RS. In both men  
661 and women, the reduction of hormone synthesis and gametes are usually the earliest signs of  
662 aging (Gunes et al., 2016; Makabe et al., 1998), with other organs such as the liver and brain  
663 decreasing in volume in the elderly (Hedman et al., 2012; Makabe et al., 1998; Motta et al.,  
664 2002; Paniagua et al., 1991; Tajiri and Shimizu, 2013). Moreover, the ectopic lipid  
665 accumulation observed in normal aged people and premature menopause patients (Knauff et  
666 al., 2008; Toth and Tchernof, 2000), is only observed in planarians after the loss of either *nhr-1*  
667 or *acs-1*. Thus, decline of fat oxidation and lipid synthesis may be a general cause of aging  
668 and resorption of organs. The activation of *nhr-1* orthologs, ACS, or other downstream  
669 associated genes that may rebalance lipid metabolism may result in the rejuvenation of  
670 organs. As such, planarians present a unique opportunity to both determine whether steroid

671 hormones play a critical role in the interconnection between reproduction, lifespan and fat  
672 metabolism, and to help establish how these three processes may be causally connected.

673

## 674 **ACKNOWLEDGEMENTS**

675 We thank E. Reid and F. Walker for help in cloning and screening, all members of the A.S.A.  
676 laboratory for discussion and advice. We also thank Dr. Y. Wang, N. Thomas and other  
677 histologists in the Stowers Institute Histology Facility for their beautiful sectioning and staining  
678 work. We acknowledge S. M. Merryman and other members at the Stowers Institute Planarian  
679 Core Facility for planarian husbandry. We also acknowledge Zulin Yu, Jeffrey Lange and other  
680 members at the Stowers Institute Microscopy Facility for assistance. A.S.A. is a Howard  
681 Hughes Medical Institute and Stowers Institute for Medical Research investigator. This work  
682 was supported in part by NIH grant R37GM057260.

683

## 684 **Experimental Procedures**

### 685 **Planarian culture and RNAi feeding**

686 Sexual *S. mediterranea* were maintained at 20°C as previously described(Guo, Zhang,  
687 Rubinstein, Ross, & Alvarado, 2016) . Worms with gonopore and about 10mm length were  
688 used as sexually mature animal for experiments. The juvenile worms were ~4mm length  
689 without gonopore.

### 690 **RNA extraction and gene expression analyses**

691 RNA of the *nhr-1* and *unc* RNAi worms was extracted from the whole worms in TRIzol (Life  
692 Technologies), following the manual instruction. The RNA samples were further analyzed by  
693 Qubit (Invitrogen) and Agilent Bioanalyzer. For each sample, ~100ng RNA was used to

694 generate the library using the Illumina TruSeq kit and sequenced in 150-bp paired reads using  
695 an Illumina MiSeq sequencer. Sequencing reads were mapped to the reference transcriptome,  
696 which contains sequencing data from TSA accession GDAG00000000.1 and additional NCBI  
697 deposited sequences. Reads were mapped with bowtie2 (Langmead & Salzberg, 2012) using  
698 default options other than allowing for multiple mapping (-k 100), due to the non-redundant  
699 nature of the transcript database. The mature and juvenile sexual *S. mediterranea*  
700 transcriptomes were generated as previously described (Xiang, Miller, Ross, Sanchez  
701 Alvarado, & Hawley, 2014). The CIW4 transcriptome was obtained from previous publication  
702 (Davies et al., 2017). Expression analysis was performed using DESEQ2 with default  
703 parameters (Love, Huber, & Anders, 2014).

704 For the genes expresses higher in sexually mature animals, comparing with the juvenile  
705 animals, the longest open reading frames were predicted from the RNAseq. Paircoil2  
706 (McDonnell, Jiang, Keating, & Berger, 2006) with default parameters was used to predict the  
707 Coiled-coil domain and hmmscan (version 3.0rc2) (<http://hmmer.org/>) against PFAM-A (Finn  
708 et al., 2016) with a minimum e-value of 0.01 was used to predict the Zinc-finger domain.

709 Gene Ontology (GO) terms was analyzed for the genes decreased after *nhr-1* RNAi feeding 6  
710 or 8 times ( $p < 0.01$ ). GO (Gene Ontology, 2015) were assigned to each *S. mediterranea* gene  
711 based on homologous PFAM domains and significant Swissprot hits. GO term enrichment was  
712 performed using the R package topGO (Alexa & Rahnenfuhrer, 2010).

### 713 **Molecular cloning and RNAi**

714 Genes were cloned from the cDNA library, which was generated by reversed transcription from  
715 the mRNA of sexually matured *S. mediterranea*. The target genes were amplified with gene

716 specific primers with overhangs and cloned to the pPR-T4P vectors (J. Rink) as previously  
717 described (Adler, Seidel, McKinney, & Sanchez Alvarado, 2014). DsRNA was produced in the  
718 bacteria and mixed with liver for RNAi feedings as previously described (Reddien, Bermange,  
719 Murfitt, Jennings, & Sanchez Alvarado, 2005).

## 720 **Whole mount DAPI and Lectin staining**

721 Whole mount DAPI and PNA staining was done as previously described (Chong, Stary, Wang,  
722 & Newmark, 2011) with the following modifications. The sexual adult animal was killed in 10%  
723 N-acetyl cysteine (Sigma-Aldrich) in PBS for 5min. Then, the animal was fixed in 4% PFA,  
724 which containing 10% acetic acid for 1hr. After washout the fixation solution, the animal was  
725 treated in 10%SDS for 10min, which was followed by 1%NP40 0.5%SDS in PBS 20min.  
726 Bleach was done in 1.2%H<sub>2</sub>O<sub>2</sub> with 5% formamide in 0.5xSSC above white light, which  
727 usually take 4hrs. After wash, the animal was blocked in gelatin Blocking buffer (0.6%BSA and  
728 0.45%Fish gelatin in PBS) for 1hr and stained by staining solution (DAPI 5ug/ml and PNA-  
729 FITC 1:1000 in gelatin Blocking buffer) at 4°C for 2 days. After washing, the animal was fixed  
730 and mounted in 80% glycerol containing 2.5 % DABCO (Sigma-Aldrich) in PBS.

731 For screening, the sample was imaged by PerkinElmer Ultraview spinning-disc microscope  
732 and the max z projection was used to get the final image. For high resolution whole mount  
733 testes staining, which was used to identify the cell meiosis stages, the images were taken by  
734 LSM 510 META (Zeiss) with 100x oil lens and reconstructed by IMARIS.

## 735 **Telomere fluorescence *in situ* hybridization**



736 Sexually mature planarians were killed in 7.5% N-acetyl cysteine (Sigma-Aldrich) in PBS for  
737 5min, followed by a fixation in 4% Paraformaldehyde, Triton X-100 0.3% in PBS overnight at  
738 4°C. After washing 3 times with PBS containing Tween-20 (0.3%), the sample was dehydrated  
739 through 30% sucrose and followed by embedding with OCT compound (Tissue-Tek, CA).  
740 Sagittal sections with 20µm thickness were cut using a Leica CM3050S cryostat (Leica  
741 Biosystems Inc. Buffalo Grove, IL).

742 Telomere probes (sequence: [TTAGGG] $\times$ 7) were labeled with DIG-dUTP with Terminal  
743 Transferase (Roche) according to the manufacturer's protocol. Labeled probes were  
744 suspended in deionized formamide (Sigma). For hybridization, a Master Hybridization Mix (4 $\times$   
745 Saline-Sodium citrate buffer [SSC], 20% dextran sulfate, 2 mg/mL nuclease-free Bovine Serum  
746 Albumin [BSA], 50% deionized formamide in ddH<sub>2</sub>O) was mixed with 1/10<sup>th</sup> volume of  
747 telomere probes. DNA were denatured at 70 °C for 5 min. Hybridization was carried at RT for  
748 36 to 48 hours. Slides were then washed with 2 $\times$  SSC, 0.5 $\times$  SSC, and TNT (100 mM Tris-HCl,  
749 150 mM NaCl, 0.1% Tween-20) for 15 min each at RT. Anti-DIG-Rhodamine (Sigma Aldrich)  
750 was used at 1:200 in TNB buffer (5% Fetal Bovine Serum [FBS] in TNT) and incubated  
751 overnight. The following day the slides were washed with TNT buffer and stained with DAPI  
752 before imaging.

### 753 **Whole mount *in situ* hybridization**

754 The RNA probe and in situ hybridization was done as previously described (Chong, Collins,  
755 Brubacher, Zarkower, & Newmark, 2013; King & Newmark, 2013; Wang, Zayas, Guo, &  
756 Newmark, 2007), with the following modifications. Animals were fixed in 4% formaldehyde in

757 1x PBS for 1hr. Animals were bleached in 3%H<sub>2</sub>O<sub>2</sub> with 3% formamide in 0.5xSSC for 3-4hrs.

758 The sample was mounted in Glycerol (80%), DABCO (2.5%) (Sigma-Aldrich) in PBS.

759 For fluorescent WISH, images were taken by Zeiss LSM-510 or PerkinElmer Ultraview  
760 spinning-disc microscope and Z projected, if not specified. For colorimetric WISH, images were  
761 taken by Leica M205 FA.

## 762 **Hematoxylin and eosin staining**

763 The animals were killed in 5% N-acetyl cysteine (Sigma-Aldrich) in PBS for 5min, followed by a  
764 fixation in 4% Paraformaldehyde, Triton X-100 0.3% in PBS overnight at 4°C. After washing 3  
765 times with PBS containing Tween-20 (0.3%), the sample was dehydrated, mounted in paraffin,  
766 serial sectioned (5µm thickness) and stained by H&E as previously describe (Adler et al.,  
767 2014).

768 The images were taken by Leica DM6000 with 20X objective lens and merged using  
769 Photoshop.

## 770 **Oil red O staining and quantification**

771 For staining on sections, the sexual adult animal was killed in 7.5% N-acetyl cysteine (Sigma-  
772 Aldrich) in PBS for 5min and fixed in 4% paraformaldehyde, Triton X-100 0.1% in PBS  
773 overnight at 4°C and rinsed with 1X PBS for 3 times. Fixed worm was dehydrated through 30%  
774 sucrose and followed by embedding with OCT compound (Tissue-Tek, CA). Cryo sections with  
775 14µm thickness were cut using a Leica CM3050S cryostat (Leica Biosystems Inc. Buffalo  
776 Grove, IL). After washing off OCT (3 x 5 min with PBS), cryo sections were pre-treated with  
777 propylene glycol for 2 min, followed by incubation with pre-warmed Oil Red O solution (EMS,

778 cat# 26504-01) for 20min at 37°C. The slides were rinsed with 85% propylene glycol for 15  
779 secs, and then with pre-warmed PBS at 37°C for 5 min twice. After DAPI (1:1000) stained at  
780 4°C overnight, slide was mount and coverslipped with ProLong Gold Antifade Mountant media  
781 (Thermo Fisher Scientific, cat# P36930). For whole mount samples, worm was pretreated by  
782 N-acetyl cysteine and fixed as above. After washing by 0.1% TritonX-100 in PBS once and in  
783 PBS for additional two times, the worm was bleached in 3%H<sub>2</sub>O<sub>2</sub> with 3% formamide in  
784 0.5xSSC for 3-4hrs. After washing out the bleach solution, the worm was stained by Oil Red O  
785 with following modifications. Soaked in Oil Red O solution for 30min. After DAPI staining, the  
786 sample was post fixed with 4% Paraformaldehyde, Triton X-100 0.3% in PBS for 20min at RT.  
787 After wash, the worm was cleared in 80% glycerol at 4°C for 24 hrs and mounted in Glycerol  
788 (80%), DABCO (2.5%) (Sigma-Aldrich) in PBS.

789 Three channel transmitted light images of the planarian tail sections were acquired on an  
790 Olympus VS120 Slide Scanner and processed similar to previous work(O'Rourke, Soukas,  
791 Carr, & Ruvkun, 2009). Red, green and blue channels were separated, and an average of the  
792 green and blue was subtracted from the red. This image was thresholded to identify only  
793 regions of appreciable oil red staining and the red intensity in those regions was summed. The  
794 entire worm slice was segmented by thresholding to quantify its area. The image of whole  
795 mount sample was taken by Axioplan 206 std (Zeiss) with 10x lens.

#### 796 **ACS and Acetyl-CoA treatment**

797 Acyl-coenzyme A Synthetase (Sigma) was dissolved in nuclear free water to a final  
798 concentration of 0.25u/μl. After *nhr-1* RNAi feeding 4 times, ACS solution (2.5μl per worm per  
799 feeding) was mixed with *nhr-1* RNAi food (10μl per worm per feeding) for the following 6

800 feedings. Instead of the ACS solution, nuclease free water was mixed with *nhr-1* RNAi food at  
801 the same ratio for the last 6 feedings in the control animal. The present of testes and gland  
802 was tested 7 days after the last feeding.

803 Acetyl coenzyme A sodium salt (Sigma A2056) was used to rescue the *nhr-1* RNAi by feeding  
804 (30 nmol/worm, same protocol as above) or injection. After the sexually matured planarian had  
805 been fed by *nhr-1* RNAi food 4 times, injection was performed 3 days after each RNAi feeding  
806 for the following 6 feedings. Acetyl coenzyme A sodium salt was dissolved in nuclear free  
807 water to a final concentration of 25nmol/ $\mu$ l. 2 $\mu$ l Acetyl coenzyme A solution (or nuclease free  
808 water for the control group) was injected to every animal each time by using a Drummond  
809 Nanoject II microinjector (Broomall, PA)(Newmark, Reddien, Cebria, & Sanchez Alvarado,  
810 2003). The present of testes and gland was tested 7 days after the last feeding.

## 811 **Statistical analyses**

812 For statistical analyses of meiosis cells with bouquet in *nhr-1* RNAi animal vs. control animal,  
813 we used two-tailed Fisher's exact test. Other statistical analyses were performed using  
814 Student's t test.

815

## 816 **Accession Numbers**

817 All RNA-seq datasets have been deposited in GEO: Accession number for *nhr-1(RNAi)* RNA-  
818 seq is GSE107756. Accession number for sexual fragment regeneration data is [GSE107869](https://www.ncbi.nlm.nih.gov/geo/query/acc.cgi?acc=GSE107869).

819

820

## 821 **References**

822 Allen, A.K., and Spradling, A.C. (2008). The Sf1-related nuclear hormone receptor Hr39  
823 regulates Drosophila female reproductive tract development and function. *Development* 135,  
824 311-321.

- 825 Asahina, M., Ishihara, T., Jindra, M., Kohara, Y., Katsura, I., and Hirose, S. (2000). The  
826 conserved nuclear receptor Ftz-F1 is required for embryogenesis, moulting and reproduction in  
827 *Caenorhabditis elegans*. *Genes Cells* 5, 711-723.
- 828 Ballinger, R.E. (1977). Reproductive strategies: food availability as a source of proximal  
829 variation in a lizard. *ecology* 58, 628-635.
- 830 Barton, L.J., LeBlanc, M.G., and Lehmann, R. (2016). Finding their way: themes in germ cell  
831 migration. *Current opinion in cell biology* 42, 128-137.
- 832 Bertoldo, M.J., Faure, M., Dupont, J., and Froment, P. (2015). AMPK: a master energy  
833 regulator for gonadal function. *Front Neurosci* 9, 235.
- 834 Beyaz, S., Mana, M.D., Roper, J., Kedrin, D., Saadatpour, A., Hong, S.J., Bauer-Rowe, K.E.,  
835 Xifaras, M.E., Akkad, A., Arias, E., *et al.* (2016). High-fat diet enhances stemness and  
836 tumorigenicity of intestinal progenitors. *Nature* 531, 53-58.
- 837 Bronson, F.H. (1989). *Mammalian reproductive biology* (Chicago, University of Chicago  
838 Press).
- 839 Chantranupong, L., Wolfson, R.L., and Sabatini, D.M. (2015). Nutrient-sensing mechanisms  
840 across evolution. *Cell* 161, 67-83.
- 841 Chappell, P.E., Lydon, J.P., Conneely, O.M., O'Malley, B.W., and Levine, J.E. (1997).  
842 Endocrine defects in mice carrying a null mutation for the progesterone receptor gene.  
843 *Endocrinology* 138, 4147-4152.
- 844 Chong, T., Collins, J.J., 3rd, Brubacher, J.L., Zarkower, D., and Newmark, P.A. (2013). A sex-  
845 specific transcription factor controls male identity in a simultaneous hermaphrodite. *Nature*  
846 *communications* 4, 1814.
- 847 Chong, T., Stary, J.M., Wang, Y., and Newmark, P.A. (2011). Molecular markers to  
848 characterize the hermaphroditic reproductive system of the planarian *Schmidtea mediterranea*.  
849 *BMC developmental biology* 11, 69.
- 850 Chretien, J.H. (2011). Characterization of Spermatogenesis in the Planarian *S. mediterranea*.  
851 In *Molecular & Cell Biology UC Berkeley* (UC Berkeley).
- 852 Collins, J.J., 3rd, Hou, X., Romanova, E.V., Lambrus, B.G., Miller, C.M., Saberi, A., Sweedler,  
853 J.V., and Newmark, P.A. (2010). Genome-wide analyses reveal a role for peptide hormones in  
854 planarian germline development. *PLoS biology* 8, e1000509.
- 855 Conboy, I.M., and Rando, T.A. (2005). Aging, stem cells and tissue regeneration: lessons from  
856 muscle. *Cell cycle* 4, 407-410.
- 857 Corona, G., Mannucci, E., Forti, G., and Maggi, M. (2009). Hypogonadism, ED, metabolic  
858 syndrome and obesity: a pathological link supporting cardiovascular diseases. *Int J Androl* 32,  
859 587-598.
- 860 Davies, E.L., Lei, K., Seidel, C.W., Kroesen, A.E., McKinney, S.A., Guo, L., Robb, S.M., Ross,  
861 E.J., Gotting, K., and Alvarado, A.S. (2017). Embryonic origin of adult stem cells required for  
862 tissue homeostasis and regeneration. *eLife* 6.
- 863 Delgado-Coello, B., Briones-Orta, M.A., Macias-Silva, M., and Mas-Oliva, J. (2011).  
864 Cholesterol: recapitulation of its active role during liver regeneration. *Liver Int* 31, 1271-1284.
- 865 Della Torre, S., Benedusi, V., Fontana, R., and Maggi, A. (2014). Energy metabolism and  
866 fertility: a balance preserved for female health. *Nature reviews Endocrinology* 10, 13-23.
- 867 Downs, S.M., Mosey, J.L., and Klinger, J. (2009). Fatty acid oxidation and meiotic resumption  
868 in mouse oocytes. *Molecular reproduction and development* 76, 844-853.

- 869 Dunning, K.R., Cashman, K., Russell, D.L., Thompson, J.G., Norman, R.J., and Robker, R.L.  
870 (2010). Beta-oxidation is essential for mouse oocyte developmental competence and early  
871 embryo development. *Biology of reproduction* 83, 909-918.
- 872 Eliassen, J.-E., and Vahl, O. (1982). Seasonal variations in biochemical composition and  
873 energy content of liver, gonad and muscle of mature and immature cod, *Gadus morhua* (L.)  
874 from Balsfjorden, northern Norway. *Journal of Fish Biology* 20, 707-716.
- 875 Ellis, J.M., Frahm, J.L., Li, L.O., and Coleman, R.A. (2010). Acyl-coenzyme A synthetases in  
876 metabolic control. *Curr Opin Lipidol* 21, 212-217.
- 877 Fernandez, M.A., Albor, C., Ingelmo-Torres, M., Nixon, S.J., Ferguson, C., Kurzchalia, T.,  
878 Tebar, F., Enrich, C., Parton, R.G., and Pol, A. (2006). Caveolin-1 is essential for liver  
879 regeneration. *Science* 313, 1628-1632.
- 880 Gargett, C.E., Nguyen, H.P., and Ye, L. (2012). Endometrial regeneration and endometrial  
881 stem/progenitor cells. *Reviews in endocrine & metabolic disorders* 13, 235-251.
- 882 Gazit, V., Weymann, A., Hartman, E., Finck, B.N., Hruz, P.W., Tzekov, A., and Rudnick, D.A.  
883 (2010). Liver regeneration is impaired in lipodystrophic fatty liver dystrophy mice. *Hepatology*  
884 52, 2109-2117.
- 885 Gissendanner, C.R., Crossgrove, K., Kraus, K.A., Maina, C.V., and Sluder, A.E. (2004).  
886 Expression and function of conserved nuclear receptor genes in *Caenorhabditis elegans*.  
887 *Developmental biology* 266, 399-416.
- 888 Gissendanner, C.R., Kelley, K., Nguyen, T.Q., Hoener, M.C., Sluder, A.E., and Maina, C.V.  
889 (2008). The *Caenorhabditis elegans* NR4A nuclear receptor is required for spermatheca  
890 morphogenesis. *Developmental biology* 313, 767-786.
- 891 Grasso, M., Montanaro, L., and Quaglia, A. (1975). Studies on the role of neurosecretion in the  
892 induction of sexuality in a planarian agamic strain. *J Ultrastruct Res* 52, 404-408.
- 893 Grevengoed, T.J., Klett, E.L., and Coleman, R.A. (2014). Acyl-CoA metabolism and  
894 partitioning. *Annu Rev Nutr* 34, 1-30.
- 895 Gunes, S., Hekim, G.N., Arslan, M.A., and Asci, R. (2016). Effects of aging on the male  
896 reproductive system. *J Assist Reprod Genet* 33, 441-454.
- 897 Guo, J.K., and Cantley, L.G. (2010). Cellular maintenance and repair of the kidney. *Annual*  
898 *review of physiology* 72, 357-376.
- 899 Guo, L., Zhang, S., Rubinstein, B., Ross, E., and Alvarado, A.S. (2016). Widespread  
900 maintenance of genome heterozygosity in *Schmidtea mediterranea*. 1, 0019.
- 901 Hansen, M., Flatt, T., and Aguilaniu, H. (2013). Reproduction, fat metabolism, and life span:  
902 what is the connection? *Cell metabolism* 17, 10-19.
- 903 Hedman, A.M., van Haren, N.E., Schnack, H.G., Kahn, R.S., and Hulshoff Pol, H.E. (2012).  
904 Human brain changes across the life span: a review of 56 longitudinal magnetic resonance  
905 imaging studies. *Hum Brain Mapp* 33, 1987-2002.
- 906 Huang, S.C., Freitas, T.C., Amiel, E., Everts, B., Pearce, E.L., Lok, J.B., and Pearce, E.J.  
907 (2012). Fatty acid oxidation is essential for egg production by the parasitic flatworm  
908 *Schistosoma mansoni*. *PLoS pathogens* 8, e1002996.
- 909 Indiveri, C., Iacobazzi, V., Tonazzi, A., Giangregorio, N., Infantino, V., Convertini, P., Console,  
910 L., and Palmieri, F. (2011). The mitochondrial carnitine/acylcarnitine carrier: function, structure  
911 and physiopathology. *Mol Aspects Med* 32, 223-233.
- 912 Iyer, H., Collins, J.J., 3rd, and Newmark, P.A. (2016a). NF-YB Regulates Spermatogonial  
913 Stem Cell Self-Renewal and Proliferation in the Planarian *Schmidtea mediterranea*. *PLoS*  
914 *genetics* 12, e1006109.

- 915 Iyer, H., Issigonis, M., Sharma, P.P., Extavour, C.G., and Newmark, P.A. (2016b). A premeiotic  
916 function for boule in the planarian *Schmidtea mediterranea*. *Proceedings of the National*  
917 *Academy of Sciences of the United States of America* *113*, E3509-3518.
- 918 Judd, E.T., Wessels, F.J., Drewry, M.D., Grove, M., Wright, K., Hahn, D.A., and Hatle, J.D.  
919 (2011). Ovariectomy in grasshoppers increases somatic storage, but proportional allocation of  
920 ingested nutrients to somatic tissues is unchanged. *Aging Cell* *10*, 972-979.
- 921 Knapp, D., and Tanaka, E.M. (2012). Regeneration and reprogramming. *Current opinion in*  
922 *genetics & development* *22*, 485-493.
- 923 Knauff, E.A., Westerveld, H.E., Goverde, A.J., Eijkemans, M.J., Valkenburg, O., van Santbrink,  
924 E.J., Fauser, B.C., and van der Schouw, Y.T. (2008). Lipid profile of women with premature  
925 ovarian failure. *Menopause* *15*, 919-923.
- 926 Knoll, L.J., Johnson, D.R., and Gordon, J.I. (1994). Biochemical studies of three  
927 *Saccharomyces cerevisiae* acyl-CoA synthetases, Faa1p, Faa2p, and Faa3p. *The Journal of*  
928 *biological chemistry* *269*, 16348-16356.
- 929 Kørbling, M., and Estrov, Z. (2003). Adult stem cells for tissue repair - a new therapeutic  
930 concept? *N Engl J Med* *349*, 570-582.
- 931 Kurzchalia, T.V., and Ward, S. (2003). Why do worms need cholesterol? *Nat Cell Biol* *5*, 684-  
932 688.
- 933 Leung, D.W. (2001). The structure and functions of human lysophosphatidic acid  
934 acyltransferases. *Front Biosci* *6*, D944-953.
- 935 Lingrel, J., Moseley, A., Dostanic, I., Cougnon, M., He, S., James, P., Woo, A., O'Connor, K.,  
936 and Neumann, J. (2003). Functional roles of the alpha isoforms of the Na,K-ATPase. *Ann N Y*  
937 *Acad Sci* *986*, 354-359.
- 938 Lopez-Otin, C., Galluzzi, L., Freije, J.M., Madeo, F., and Kroemer, G. (2016). Metabolic Control  
939 of Longevity. *Cell* *166*, 802-821.
- 940 Lupas, A.N., and Basser, J. (2017). Coiled Coils - A Model System for the 21st Century.  
941 *Trends in biochemical sciences* *42*, 130-140.
- 942 Makabe, S., Motta, P.M., Naguro, T., Vizza, E., Perrone, G., and Zichella, L. (1998).  
943 Microanatomy of the female reproductive organs in postmenopause by scanning electron  
944 microscopy. *Climacteric : the journal of the International Menopause Society* *1*, 63-71.
- 945 Miller, C.M., and Newmark, P.A. (2012). An insulin-like peptide regulates size and adult stem  
946 cells in planarians. *The International journal of developmental biology* *56*, 75-82.
- 947 Miyashita, H., Nakagawa, H., Kobayashi, K., Hoshi, M., and Matsumoto, M. (2011). Effects of  
948 17beta-estradiol and bisphenol A on the formation of reproductive organs in planarians. *Biol*  
949 *Bull* *220*, 47-56.
- 950 Motta, P.M., Heyn, R., and Makabe, S. (2002). Three-dimensional microanatomical dynamics  
951 of the ovary in postreproductive aged women. *Fertility and sterility* *78*, 360-370.
- 952 Mouzat, K., Baron, S., Marceau, G., Caira, F., Sapin, V., Volle, D.H., Lumbroso, S., and  
953 Lobaccaro, J.M. (2013). Emerging roles for LXRs and LRH-1 in female reproduction. *Molecular*  
954 *and cellular endocrinology* *368*, 47-58.
- 955 Nair, A.R., and Taylor, H.S. (2010). The Mechanism of Menstruation. In *Amenorrhea*, N.  
956 Santoro, and G. Neal-Perry, eds. (Totowa, NJ, Humana Press).
- 957 Newmark, P.A., and Sanchez Alvarado, A. (2002). Not your father's planarian: a classic model  
958 enters the era of functional genomics. *Nature reviews Genetics* *3*, 210-219.
- 959 Newmark, P.A., Wang, Y., and Chong, T. (2008). Germ cell specification and regeneration in  
960 planarians. *Cold Spring Harbor symposia on quantitative biology* *73*, 573-581.

- 961 Niwa, Y.S., and Niwa, R. (2016). Transcriptional regulation of insect steroid hormone  
962 biosynthesis and its role in controlling timing of molting and metamorphosis. *Development,*  
963 *growth & differentiation* 58, 94-105.
- 964 Ono, M., Maruyama, T., and Yoshimura, Y. (2008). Regeneration and adult stem cells in the  
965 human female reproductive tract. *Stem Cells Cloning* 1, 23-29.
- 966 Paniagua, R., Nistal, M., Saez, F.J., and Fraile, B. (1991). Ultrastructure of the aging human  
967 testis. *Journal of electron microscopy technique* 19, 241-260.
- 968 Partridge, L., Gems, D., and Withers, D.J. (2005). Sex and death: what is the connection? *Cell*  
969 *120*, 461-472.
- 970 Pickett, C.L., and Kornfeld, K. (2013). Age-related degeneration of the egg-laying system  
971 promotes matricidal hatching in *Caenorhabditis elegans*. *Aging Cell* 12, 544-553.
- 972 Pietrocola, F., Galluzzi, L., Bravo-San Pedro, J.M., Madeo, F., and Kroemer, G. (2015). Acetyl  
973 coenzyme A: a central metabolite and second messenger. *Cell metabolism* 21, 805-821.
- 974 Pol, A., Gross, S.P., and Parton, R.G. (2014). Review: biogenesis of the multifunctional lipid  
975 droplet: lipids, proteins, and sites. *The Journal of cell biology* 204, 635-646.
- 976 Ramsey, E.M. (1994). *Anatomy of the human uterus*. (Cambridge, UK, Cambridge University  
977 Press).
- 978 Razin, S.V., Borunova, V.V., Maksimenko, O.G., and Kantidze, O.L. (2012). Cys2His2 zinc  
979 finger protein family: classification, functions, and major members. *Biochemistry Biokhimiia* 77,  
980 217-226.
- 981 Read, R., Hansen, G., Kramer, J., Finch, R., Li, L., and Vogel, P. (2009). Ectonucleoside  
982 triphosphate diphosphohydrolase type 5 (Entpd5)-deficient mice develop progressive  
983 hepatopathy, hepatocellular tumors, and spermatogenic arrest. *Vet Pathol* 46, 491-504.
- 984 Reiff, T., Jacobson, J., Cognigni, P., Antonello, Z., Ballesta, E., Tan, K.J., Yew, J.Y.,  
985 Dominguez, M., and Miguel-Aliaga, I. (2015). Endocrine remodelling of the adult intestine  
986 sustains reproduction in *Drosophila*. *eLife* 4, e06930.
- 987 Reznick, D., Nunney, L., and Tessier, A. (2000). Big houses, big cars, superfleas and the costs  
988 of reproduction. *Trends Ecol Evol* 15, 421-425.
- 989 Reznick, D.N., and Braun, B. (1987). Fat cycling in the mosquitofish (*Gambusia affinis*): fat  
990 storage as a reproductive adaptation. *Oecologia* 73, 401-413.
- 991 Rion, S., and Kaweckí, T.J. (2007). Evolutionary biology of starvation resistance: what we have  
992 learned from *Drosophila*. *J Evol Biol* 20, 1655-1664.
- 993 Rock, J.R., and Hogan, B.L. (2011). Epithelial progenitor cells in lung development,  
994 maintenance, repair, and disease. *Annual review of cell and developmental biology* 27, 493-  
995 512.
- 996 Rouhana, L., Tasaki, J., Saberi, A., and Newmark, P.A. (2017). Genetic dissection of the  
997 planarian reproductive system through characterization of *Schmidtea mediterranea* CPEB  
998 homologs. *Developmental biology*.
- 999 Saberi, A., Jamal, A., Beets, I., Schoofs, L., and Newmark, P.A. (2016). GPCRs Direct  
1000 Germline Development and Somatic Gonad Function in Planarians. *PLoS biology* 14,  
1001 e1002457.
- 1002 Sano, H., Renault, A.D., and Lehmann, R. (2005). Control of lateral migration and germ cell  
1003 elimination by the *Drosophila melanogaster* lipid phosphate phosphatases Wunen and Wunen  
1004 2. *The Journal of cell biology* 171, 675-683.



- 1005 Seli, E., Babayev, E., Collins, S.C., Nemeth, G., and Horvath, T.L. (2014). Minireview:  
1006 Metabolism of female reproduction: regulatory mechanisms and clinical implications. *Molecular*  
1007 *endocrinology* 28, 790-804.
- 1008 Shanley, D.P., and Kirkwood, T.B. (2000). Calorie restriction and aging: a life-history analysis.  
1009 *Evolution* 54, 740-750.
- 1010 Sharpe, L.J., and Brown, A.J. (2013). Controlling cholesterol synthesis beyond 3-hydroxy-3-  
1011 methylglutaryl-CoA reductase (HMGCR). *The Journal of biological chemistry* 288, 18707-  
1012 18715.
- 1013 Shynlova, O., Oldenhof, A., Dorogin, A., Xu, Q., Mu, J., Nashman, N., and Lye, S.J. (2006).  
1014 Myometrial apoptosis: activation of the caspase cascade in the pregnant rat myometrium at  
1015 midgestation. *Biology of reproduction* 74, 839-849.
- 1016 Sieber, M.H., and Spradling, A.C. (2015). Steroid Signaling Establishes a Female Metabolic  
1017 State and Regulates SREBP to Control Oocyte Lipid Accumulation. *Current biology : CB* 25,  
1018 993-1004.
- 1019 Soroosh, P., Wu, J., Xue, X., Song, J., Sutton, S.W., Sablad, M., Yu, J., Nelen, M.I., Liu, X.,  
1020 Castro, G., *et al.* (2014). Oxysterols are agonist ligands of ROR $\gamma$  and drive Th17 cell  
1021 differentiation. *Proceedings of the National Academy of Sciences of the United States of*  
1022 *America* 111, 12163-12168.
- 1023 Sun, J., and Spradling, A.C. (2013). Ovulation in *Drosophila* is controlled by secretory cells of  
1024 the female reproductive tract. *eLife* 2, e00415.
- 1025 Tajiri, K., and Shimizu, Y. (2013). Liver physiology and liver diseases in the elderly. *World J*  
1026 *Gastroenterol* 19, 8459-8467.
- 1027 Tang, H., and Han, M. (2017). Fatty Acids Regulate Germline Sex Determination through ACS-  
1028 4-Dependent Myristoylation. *Cell* 169, 457-469 e413.
- 1029 Tatar, M., Kopelman, A., Epstein, D., Tu, M.P., Yin, C.M., and Garofalo, R.S. (2001). A mutant  
1030 *Drosophila* insulin receptor homolog that extends life-span and impairs neuroendocrine  
1031 function. *Science* 292, 107-110.
- 1032 Taub, R. (2004). Liver regeneration: from myth to mechanism. *Nat Rev Mol Cell Biol* 5, 836-  
1033 847.
- 1034 Tharp, M.E., Collins, J.J., 3rd, and Newmark, P.A. (2014). A lophotrochozoan-specific nuclear  
1035 hormone receptor is required for reproductive system development in the planarian.  
1036 *Developmental biology* 396, 150-157.
- 1037 Tillander, V., Alexson, S.E.H., and Cohen, D.E. (2017). Deactivating Fatty Acids: Acyl-CoA  
1038 Thioesterase-Mediated Control of Lipid Metabolism. *Trends Endocrinol Metab* 28, 473-484.
- 1039 Toth, M.J., and Tchernof, A. (2000). Lipid metabolism in the elderly. *Eur J Clin Nutr* 54 *Suppl* 3,  
1040 S121-125.
- 1041 Trentalance, A., Leoni, S., Mangiantini, M.T., Spagnuolo, S., Feingold, K., Hughes-Fulford, M.,  
1042 Siperstein, M., Cooper, A.D., and Erickson, S.K. (1984). Regulation of 3-hydroxy-3-  
1043 methylglutaryl-coenzyme A reductase and cholesterol synthesis and esterification during the  
1044 first cell cycle of liver regeneration. *Biochimica et biophysica acta* 794, 142-151.
- 1045 Truebestein, L., and Leonard, T.A. (2016). Coiled-coils: The long and short of it. *BioEssays :*  
1046 *news and reviews in molecular, cellular and developmental biology* 38, 903-916.
- 1047 Tu, M.K., Levin, J.B., Hamilton, A.M., and Borodinsky, L.N. (2016). Calcium signaling in  
1048 skeletal muscle development, maintenance and regeneration. *Cell calcium* 59, 91-97.
- 1049 Valencak, T.G., Tataruch, F., and Ruf, T. (2009). Peak energy turnover in lactating European  
1050 hares: the role of fat reserves. *J Exp Biol* 212, 231-237.

- 1051 Walker, V.R., and Korach, K.S. (2004). Estrogen receptor knockout mice as a model for  
1052 endocrine research. *ILAR J* 45, 455-461.
- 1053 Wang, M.C., O'Rourke, E.J., and Ruvkun, G. (2008). Fat metabolism links germline stem cells  
1054 and longevity in *C. elegans*. *Science* 322, 957-960.
- 1055 Wang, Y., Stry, J.M., Wilhelm, J.E., and Newmark, P.A. (2010). A functional genomic screen  
1056 in planarians identifies novel regulators of germ cell development. *Genes & development* 24,  
1057 2081-2092.
- 1058 Wang, Y., Zayas, R.M., Guo, T., and Newmark, P.A. (2007). *nanos* function is essential for  
1059 development and regeneration of planarian germ cells. *Proceedings of the National Academy*  
1060 *of Sciences of the United States of America* 104, 5901-5906.
- 1061 Wang, Z., Stoltzfus, J., You, Y.J., Ranjit, N., Tang, H., Xie, Y., Lok, J.B., Mangelsdorf, D.J.,  
1062 and Kliewer, S.A. (2015). The nuclear receptor DAF-12 regulates nutrient metabolism and  
1063 reproductive growth in nematodes. *PLoS genetics* 11, e1005027.
- 1064 Wollam, J., and Antebi, A. (2011). Sterol regulation of metabolism, homeostasis, and  
1065 development. *Annu Rev Biochem* 80, 885-916.
- 1066 Xiang, Y., Miller, D.E., Ross, E.J., Sanchez Alvarado, A., and Hawley, R.S. (2014).  
1067 Synaptonemal complex extension from clustered telomeres mediates full-length chromosome  
1068 pairing in *Schmidtea mediterranea*. *Proceedings of the National Academy of Sciences of the*  
1069 *United States of America* 111, E5159-5168.
- 1070 Yeh, S., Tsai, M.Y., Xu, Q., Mu, X.M., Lardy, H., Huang, K.E., Lin, H., Yeh, S.D., Altuwaijri, S.,  
1071 Zhou, X., *et al.* (2002). Generation and characterization of androgen receptor knockout  
1072 (ARKO) mice: an in vivo model for the study of androgen functions in selective tissues.  
1073 *Proceedings of the National Academy of Sciences of the United States of America* 99, 13498-  
1074 13503.
- 1075 Zhu, H., and Han, M. (2014). Exploring developmental and physiological functions of fatty acid  
1076 and lipid variants through worm and fly genetics. *Annual review of genetics* 48, 119-148.

## 1078 Figure Legends

1079  
1080 **Figure 1:** Functional screen of sexual planarian enriched genes revealed *nhr-1* as an essential  
1081 gene for reproductive system maintenance.

- 1082 (A) Comparison of the juvenile and sexual adult planarian transcriptome (n=3 replicates,  
1083 each containing 3 planarians. "D0" represents decapitated adult animals. 7.89%  
1084 transcripts were expressed significantly higher in adult animals (in green, t-test, adj.  
1085 p<0.05), while 2.58% of transcripts were expressed higher in juvenile animals (in blue, t-  
1086 test, adj. p<0.05).
- 1087 (B) RNAi feeding schedule diagram. Adult planarians were given RNAi by feeding 8 times  
1088 as indicated and checked 7 days after the last round of feeding.
- 1089 (C) *In situ* test of *nhr-1* and *nanos* expression in testes. DAPI staining showed the observed  
1090 testes morphology at the same anatomical location. Scale bar: 100µm
- 1091 (D) Nuclear and gland staining of the *nhr-1(RNAi)* animals. DAPI staining was stronger in  
1092 spermatids (blue arrowheads), spermatozoa and other testes cells (blue triangles)  
1093 compared to somatic tissues. Penis papilla was also visible by DAPI staining (blue  
1094 asterisks). Glands were stained by PNA. Scale bar: 20µm

1095  
1096 **Figure 2:** *nhr-1* is necessary for sexual reproductive system maintenance in adult planarians.

- 1097 (A) Nuclear and telomere staining in one nuclear layer in testes. Scale bar:10 $\mu$ m  
1098 (B) Histogram of leptotene, zygotene and pachytene stage spermatocytes distribution in  
1099 meiosis I cells observed in half testes by whole mount DAPI staining (n=4 for each  
1100 sample, \*p<0.05).  
1101 (C) Representative image showing normal bouquet in control animals (upper row) and failed  
1102 bouquet (lower row) in *nhr-1(RNAi)* animals. Scale bar: 5 $\mu$ m  
1103 (D) Nuclear and FISH staining for gland and sperm duct in control and *nhr-1(RNAi)* animal  
1104 tails. Scale bar: 100 $\mu$ m  
1105 (E) Nuclear and FISH staining for *nhr-1* expression in oviduct (red arrowheads) in control  
1106 and *nhr-1(RNAi)* animals. Red stars show the brain close to the ovary. Ovaries are in  
1107 red circles. Scale bar: 20 $\mu$ m  
1108

1109 **Figure 3:** *nhr-1* specifically regulates reproductive system regeneration.

- 1110 (A) Head fragment regeneration time course. Red rectangle indicates the imaging region in  
1111 panel B. Scale bar: 100 $\mu$ m  
1112 (B) DAPI and FISH staining for *nhr-1* and *nanos* in the dorsal gland region of the  
1113 regenerated tail. Yellow arrowhead shows *nhr-1* expression. Green arrowhead shows  
1114 expression of *nanos*. Scale bar: 100 $\mu$ m  
1115 (C) Feeding and amputation schedule for testing function of *nhr-1* during regeneration.  
1116 Adult animals were amputated after 8 rounds of RNAi feeding. 8 days after amputation,  
1117 the regenerated RNAi animals were fed with RNAi food for 15 more times.  
1118 (D) Hematoxylin and eosin (H&E) staining of animals regenerated from control *unc-22(RNAi)*  
1119 and *nhr-1(RNAi)* animals 68 days after amputation. Orange triangle shows the  
1120 copulatory bursa. Blue arrowhead indicates bulbar cavity. Blue asterisk marks penis  
1121 papilla. Blue triangle points at testis. Scale bar: 100 $\mu$ m  
1122 (E) Zoom in of the H&E staining in the putative testes region circled in panel D.  
1123 (F) DAPI and FISH staining for *plastin* and *tsp-1* in dorsal gland region of regenerated tail.  
1124 Scale bar: 100 $\mu$ m  
1125 (G) Image of regenerated head from *unc-22(RNAi)* control and *nhr-1(RNAi)* tail fragments 4  
1126 and 7 days post amputation. Scale bar: 400 $\mu$ m  
1127 (H) DAPI and FISH staining for *grn* and *eyesabsent (eya)* in the ventral site of regenerated  
1128 head. Ovaries are in the red circles. Oviducts are pointed by red arrowheads. Red star  
1129 shows the brain in close proximity to the ovary. Scale bar: 100 $\mu$ m  
1130

1131 **Figure 4:** *nhr-1* is necessary for reproductive system and lipid metabolism genes expression.

- 1132 (A) RNAi feeding schedule and sample collection for transcriptome analysis. Both the  
1133 control (*unc-22 RNAi*) and test (*nhr-1 RNAi*) animals were collected 2 days after RNAi  
1134 feeding 4, 6 and 8 times. 2 days after collection, mRNA was extracted from those  
1135 animals and submitted for sequencing (n=4 replicates, each containing 2-4 planarians).  
1136 The transcriptome was compared between *unc-22* and *nhr-1* RNAi animals, which were  
1137 withdrawn at the same time.  
1138 (B) Venn diagram showing the number of transcripts decreased after *nhr-1* RNAi feedings  
1139 at different time points (t-test, adj. p<0.05).  
1140 (C) The fold change of the expression of reproductive system related genes that decreased  
1141 after *nhr-1* RNAi.

1142 (D) The histogram shows the gene ontology (GO) terms with the 10 lowest Benjamini-  
1143 Hochberg multiple testing correction (BH) value for the transcripts that decreased after  
1144 *nhr-1* RNAi feeding 6 times. The BH values of those ten terms for the transcripts  
1145 decreased after *nhr-1* RNAi feeding 8 times are shown in blue. The terms relating to  
1146 lipid metabolism are shown in red. The terms relating to other metabolic process are  
1147 shown in orange.  
1148

1149 **Figure 5:** *nhr-1* is essential for novel gland genes expression.

- 1150 (A) The cartoon summarizes the dorsal tail expression pattern of the downstream genes,  
1151 which decreased after *nhr-1* RNAi feeding 4 times. The glands around the bursa canal  
1152 can be divided into 5 regions, according to those molecular markers. Examples of  
1153 genes in each region are shown in panel B to E and further zoomed in single cell layer  
1154 in panel F to I.  
1155 (B) FISH for dorsal expression of *dig-1* and *tetraspanin 66e*, which express in region 1. The  
1156 yellow box shows the region for further zoom in in panel F. Scale bar: 100µm  
1157 (C) FISH for dorsal expression of *dpg-1*, which expresses in region 3, and *tsp-1*, which  
1158 express in region 5. The yellow box shows the region for further zoom in in panel G.  
1159 Scale bar: 100µm  
1160 (D) FISH for dorsal expression of *dmg-1*, *dmg-2* and *PL04022B1F07*, which express in  
1161 region 2. The yellow box shows the region for further zoom in in panel H. Scale bar:  
1162 100µm  
1163 (E) FISH for dorsal expression of *dmg-3*, *igg-1* and *PL04022B1F07*. The yellow box shows  
1164 the region for further zoom in in panel I. Scale bar: 100µm  
1165 (F) FISH for dorsal expression of *dig-1* and *tetraspanin 66e* in single cell layer. Scale bar:  
1166 20µm  
1167 (G) FISH for dorsal expression of *dpg-1* and *tsp-1* in single cell layer. Scale bar: 20µm  
1168 (H) FISH for dorsal expression of *dmg-1*, *dmg-2* and *PL04022B1F07* in single cell layer.  
1169 Scale bar: 20µm  
1170 (I) FISH for dorsal expression of *dmg-3*, *igg-1* and *PL04022B1F07* in single cell layer.  
1171 Scale bar: 20µm  
1172 (J) FISH for expression of *dmg-8*, *dig-1* and *tetraspanin 66e* in dorsal tail of sexual worm  
1173 after *nhr-1* RNAi feeding 4 times. Scale bar: 100µm  
1174 (K) The cartoon summarizes the ventral tail expression pattern of the downstream genes,  
1175 which decreased after *nhr-1* RNAi feeding 4 times. The glands around the penis papilla  
1176 can be divided into 5 regions, according to those molecular markers and *tsp-1*.  
1177 Examples of genes in each region are shown in panel L to O and further zoomed in  
1178 single cell layer in panel P to S.  
1179 (L) FISH for ventral expression of *dig-1* and *tetraspanin 66e*, which are in region 1. The  
1180 yellow box shows the region for further zoom in in panel P. Scale bar: 100µm  
1181 (M) FISH for ventral expression of *igg-1* and *dig-2*, which express in region 4 or cement  
1182 gland. The yellow box shows the region for further zoom in in panel Q. Scale bar:  
1183 100µm  
1184 (N) FISH for ventral expression of *dmg-1*, *PL04022B1F07* and *dmg-2*, which express in  
1185 region 2. The yellow box shows the region for further zoom in in panel R. Scale bar:  
1186 100µm

- 1187 (O) FISH for ventral expression of *dmg-4*, *dmg-5* and *dmg-6*, which express in region 3. The  
1188 yellow box shows the region for further zoom in in panel S. Scale bar: 100 $\mu$ m  
1189 (P) FISH for ventral expression of *dig-1* and *tetraspanin 66e* in single cell layer. Scale bar:  
1190 20 $\mu$ m  
1191 (Q) FISH for ventral expression of *igg-1* and *dig-2* in single cell layer. Scale bar: 20 $\mu$ m  
1192 (R) FISH for ventral expression of *dmg-1*, *PL04022B1F07* and *dmg-2* in single cell layer.  
1193 Scale bar: 20 $\mu$ m  
1194 (S) FISH for ventral expression of *dmg-4*, *dmg-5* and *dmg-6* in single cell layer. Scale bar:  
1195 20 $\mu$ m  
1196 (T) FISH for expression of *dig-1* and *tetraspanin 66e* in ventral tail of sexual worm after *nhr-*  
1197 *1* RNAi feeding 4 times. Scale bar: 100 $\mu$ m  
1198 (U) FISH for expression of *dmg-4* and *dmg-6* in ventral tail of sexual worm after *nhr-1* RNAi  
1199 feeding 4 times. Scale bar: 100 $\mu$ m  
1200

1201 **Figure 6:** *Smed-acs-1*, a downstream gene of *nhr-1*, is essential for reproductive system  
1202 development, maintenance and regeneration.

- 1203 (A) DAPI and PNA staining of the tail region in sexual mature planarian after *Smed-acs-1*  
1204 RNAi feeding 6 and 9 times. The blue triangles point to the testes without mature  
1205 spermatozoa. The white triangles point to the regressing gland stained by PNA. The  
1206 blue snow flake marks the penis papilla. Scale bar: 100 $\mu$ m  
1207 (B) DAPI staining of the ovary and oviduct region in sexual mature planarian after *Smed-*  
1208 *acs-1* RNAi feeding 2, 6 and 9 times. The red circle marks the ovary. The red arrow  
1209 head points to the oviduct. Scale bar: 50 $\mu$ m  
1210 (C) DAPI and PNA staining of the tail region in grow-up hatchlings (above row) and  
1211 regenerated worms (below row) after *Smed-acs-1* RNAi feeding. The blue triangles  
1212 point to the testes without mature spermatozoa. Scale bar: 100 $\mu$ m  
1213 (D) DAPI staining of the testes and ovaries region in grow-up hatchlings (above row) and  
1214 regenerated worms (below row) after *Smed-acs-1* RNAi feeding. The red circle marks  
1215 the ovary. The red arrow head points to the oviduct. Scale bar: 50 $\mu$ m  
1216

1217 **Figure 7:** *nhr-1* maintains planarian reproductive system through regulating lipid metabolism

- 1218 (A) Oil Red O staining of the sexual adult planarian 7 days after *unc-22*, *nhr-1* and *Smed-*  
1219 *acs-1* RNAi feeding. Scale bar: 100 $\mu$ m  
1220 (B) Oil Red O staining on the transverse sections of the sexual adult planarian 7 days after  
1221 RNAi feeding. The left illustration shows the structure of the transverse section. Scale  
1222 bar: 50 $\mu$ m  
1223 (C) Histogram shows the Mean $\pm$ SEM value of the Oil Red O staining intensity in the tails  
1224 (n=3, t-test \*\*p<0.01, \*\*\*p<0.001).  
1225 (D) Oil Red O and DAPI staining around testes region. White dash line circles the testis  
1226 region according to DAPI staining. Scale bar: 10 $\mu$ m  
1227 (E) WISH of *tsp-1* and DAPI staining of the dorsal tail region in sexual planarian after long  
1228 term *nhr-1* RNAi feeding with (right) and without (left) Acetyl-CoA rescue. Scale bar:  
1229 100 $\mu$ m

- 1230 (F) WISH of *gh4* and DAPI staining of the testes region in sexual planarian after long term  
1231 *nhr-1* RNAi feeding with (below) and without (above) Acyl-CoA synthetase (ACS)  
1232 rescue. Scale bar: 20 $\mu$ m  
1233 (G) WISH of *plastin* and DAPI staining of the testes region in sexual planarian after long  
1234 term *nhr-1* RNAi feeding with (below) and without (above) Acyl-CoA synthetase (ACS)  
1235 rescue. Scale bar: 20 $\mu$ m  
1236 (H) Proposed model for reproductive system maintenance in sexual mature animals via an  
1237 *nhr-1* and lipid metabolism axis.  
1238

## 1239 Supplementary figure legends

1240  
1241 Figure S1, related to Figure 1

1242 Majority of the adult worm enriched transcripts, which contain coiled-coil domain or zinc finger  
1243 domain, express in the sexual reproductive system.

1244 (F) WISH for candidate genes for screening. The color of dots represents different  
1245 expression categories, which is explained in panel B. Scale bar: 750 $\mu$ m

1246 (G) Summary of expression patterns of screened transcripts  
1247

1248 Figure S2, related to Figure 1

1249 Histogram showing the cocoon number from different RNAi worms  
1250

1251 Figure S3, related to Figure 2

1252 *nhr-1* RNAi decreased pachytene stage cells and telomere formation in testis.

1253 (A) Histogram of cell numbers in different meiosis stages in half testis (n=4, t-test, \*p<0.05,  
1254 \*\*p<0.01).

1255 (B) Representative image showing normal bouquet in *nhr-1(RNAi)* animals. Scale bar: 5 $\mu$ m  
1256

1257  
1258 Figure S4, related to Figure 2

1259 *nhr-1* expresses in most organs in the sexual reproductive system in adult planarian.

1260 (A) FISH for *nhr-1*, *nanos* and *eya* expression in ovary and oviduct. Scale bar: 20 $\mu$ m

1261 (B) FISH for *nhr-1* and *gh4* expression in ovary. Scale bar: 20 $\mu$ m

1262 (C) FISH for *nhr-1* and *nanos* in dorsal border region. *nanos* labels the germ stem cells in  
1263 the testis. Scale bar: 100 $\mu$ m

1264 (D) FISH for *nhr-1* and *gh4* in testis. Scale bar: 20 $\mu$ m

1265 (E) FISH for *nhr-1* and *tsp-1* in dorsal tail. Scale bar: 100 $\mu$ m

1266 (F) FISH for *nhr-1*, *tsp-1* and *grn* in ventral tail. Scale bar: 100 $\mu$ m  
1267

1268 Figure S5, related to Figure 3

1269 *nhr-1* is specifically required for reproductive system regeneration.

1270 (A) Percentage of worms with gonopore during regeneration.

1271 (B) FISH for *pc2* in regenerated head and *porcupine* in regenerated tail. Scale bar: 100 $\mu$ m

1272 (C) FISH for *grn* and *eya* in regenerated tail. Scale bar: 100 $\mu$ m  
1273

1274 Figure S6, related to Figure 5

1275 *nhr-1* downstream genes, which decreased after *nhr-1* RNAi feeding 4 times, are enriched in  
1276 the reproductive system.

- 1277 (A) WISH of the 30 transcripts, which decreased after *nhr-1* RNAi feeding 4 times. Scale  
1278 bar: 750 $\mu$ m  
1279 (B) Summary of the 30 transcripts expression.  
1280 (C) Expression fold changes of genes affected after 4 rounds of *nhr-1* RNAi feeding in  
1281 asexual, juvenile, decapitated sexual adult fragments (D0) and 7 days post amputation  
1282 (D7). Each dot shows ratio of single transcripts. Mean  $\pm$ SEM of each data group  
1283 showed by lines in the figure. n=3 for juvenile, sexual adult and sexual adult fragments,  
1284 each containing 3 worms. n=4 for asexual worms as previously reported (Davies et al.,  
1285 2017).

1286  
1287 Figure S7, related to Figure 5

1288 *nhr-1* downstream genes, which decreased after *nhr-1* RNAi feeding 4 times, express in  
1289 different regions of the glands in sexual mature planarian.

1290 Panel A to H are the in the dorsal tail region. Panel I to M are in the ventral tail region.

- 1291 (A) FISH for dorsal expression of *dig-2* and *tetraspanin 66e*, which express in region 1.  
1292 Scale bar: 100 $\mu$ m  
1293 (B) FISH for dorsal expression of *dmg-4*, *dmg-5* and *dmg-6*, which express in region 2. The  
1294 yellow box shows the region for further zoom in in panel F. Scale bar: 100 $\mu$ m  
1295 (C) FISH for dorsal expression of *dmg-7* and *dmg-8*, which express in region 2. The yellow  
1296 box shows the region for further zoom in in panel G. Scale bar: 100 $\mu$ m  
1297 (D) FISH for dorsal expression of *igg-2* and *igg-3*, which express in region 4. The yellow box  
1298 shows the region for further zoom in in panel H. Scale bar: 100 $\mu$ m  
1299 (E) FISH for dorsal expression of *igg-1* and *tsp-1* in single cell layer. Scale bar: 20 $\mu$ m  
1300 (F) FISH for dorsal expression of *dmg-4*, *dmg-5* and *dmg-6* in single cell layer. Scale bar:  
1301 20 $\mu$ m  
1302 (G) FISH for dorsal expression of *dmg-7* and *dmg-8* in single cell layer. Scale bar: 20 $\mu$ m  
1303 (H) FISH for dorsal expression of *igg-2* and *igg-3* in single cell layer. Scale bar: 20 $\mu$ m  
1304 (I) FISH for ventral expression of *igg-2*, which expresses in region 2, and *igg-3*. Scale bar:  
1305 100 $\mu$ m  
1306 (J) FISH for ventral expression of *dmg-7* and *dmg-8*, which express in region 3. The yellow  
1307 box shows the region for further zoom in in panel M. Scale bar: 100 $\mu$ m  
1308 (K) FISH for ventral expression of *dmg-3*, which expresses in region 1. Scale bar: 100 $\mu$ m  
1309 (L) FISH for ventral expression of *igg-1* and *tsp-1* in single cell layer. Scale bar: 20 $\mu$ m  
1310 (M) FISH for dorsal expression of *dmg-7* and *dmg-8* in single cell layer. Scale bar: 20 $\mu$ m  
1311

1312 Figure S8, related to Figure 5

1313 *nhr-1* is essential for the expression of novel gland genes, which decreased after *nhr-1* RNAi  
1314 feeding 4 times.

1315 This figure shows the representative images of FISH for expression of novel gland genes after  
1316 *nhr-1* RNAi feeding 4 times in adult planarian. Panel A to C show the image in the dorsal  
1317 region, while panel D to F show the image in the ventral region.

- 1318 (A) FISH for expression of *dig-2*, *igg-1* and *tetraspanin 66e* in dorsal tail region. Scale bar:  
1319 100 $\mu$ m

- 1320 (B) FISH for expression of *dmg-1* and *dmg-2* in dorsal tail region. Scale bar: 100 $\mu$ m  
1321 (C) FISH for expression of *igg-2* and *igg-3* in dorsal tail region. Scale bar: 100 $\mu$ m  
1322 (D) FISH for expression of *dmg-1* and *dmg-2* in ventral tail region. Scale bar: 100 $\mu$ m  
1323 (E) FISH for expression of *dig-2*, *igg-1* and *tetraspanin 66e* in ventral tail region. Scale bar:  
1324 100 $\mu$ m  
1325 (F) FISH for expression of *dmg-7* and *dmg-8* in ventral tail region. Scale bar: 100 $\mu$ m  
1326

1327 **Figure S9, related to Figure 6**

1328 ***Smed-acs-1* expression in sexual adult animal.**

- 1329 (A) *Smed-acs-1* expression in intact asexual, juvenile, decapitated sexual adult (D0) and  
1330 sexual adult fragments (7 days after amputation, D7) according to RNAseq data. Dot  
1331 shows RPKM value in each replicate. Bar graph indicates the Mean $\pm$ SEM value for  
1332 each sample. n=3 for juvenile, sexual adult and sexual adult fragments, each containing  
1333 3 worms. n=4 for asexual worms, as previously reported (Davies et al., 2017).  
1334 \*represents the adjusted p value for each comparison group. \*\*\*\*p<0.0001.  
1335 (B) WISH of *Smed-acs-1* in dorsal and ventral region. The dorsal region in the white square  
1336 was further zoom in in the panel B. The ventral region in the white square was further  
1337 zoom in in the panel C. Scale bar: 100 $\mu$ m  
1338 (C) Zoom in of *Smed-acs-1* dorsal expression posterior of neck region. Scale bar: 50 $\mu$ m  
1339 (D) Zoom in of *Smed-acs-1* ventral expression in the ovary region. Scale bar: 50 $\mu$ m  
1340

1341 **Figure S10, related to Figure 7**

1342 ***nhr-1* maintains reproductive system through lipid metabolic pathway in sexual planarian.**

- 1343 (A) Oil Red O staining of asexual animal. Scale bar: 500 $\mu$ m  
1344 (B) DAPI staining in the dorsal tail region of the sexual mature animal after long term *nhr-1*  
1345 RNAi. Blue arrowheads point to the testes after rescue, which enrich DAPI signal. Scale  
1346 bar: 100 $\mu$ m  
1347 (C) FISH of *plastin* and *gh4* in dorsal testes region after Acetyl-CoA rescue. Scale bar:  
1348 50 $\mu$ m.  
1349 (D) FISH of *tsp-1* in dorsal tail region after Acyl-CoA rescue. Scale bar: 20 $\mu$ m.  
1350

1351 **Movie-S1**

1352 3D reconstruction of nuclei in half testis with whole-mount DAPI staining in normal sexual adult  
1353 planarian.

1354 **Movie-S2**

1355 3D reconstruction of nuclei in half testis with whole-mount DAPI staining in sexual adult  
1356 planarian after *nhr-1* RNAi feeding 6 times  
1357

1358 **Table S1, related to Figure 1**

1359 Expression level changes of the 34 genes identified to be expressed higher in decapitated  
1360 adult fragments (D0) when compared to juvenile animals. D7 shows decapitated sexual adult  
1361 fragments 7 days post amputation.  
1362

1363 **Table S2, related to Figure 4**  
1364



1365 Expression level changes of the 30 genes down-regulated after 4 rounds of *nhr-1*(RNAi)  
1366 feeding. D0 and D7 show decapitated sexual adult fragments at 0 and 7 days post amputation.

1367

1368 **Table S3, related to Figure 1 and Figure 5**

1369 Primers used for gene cloning

# Figure 1

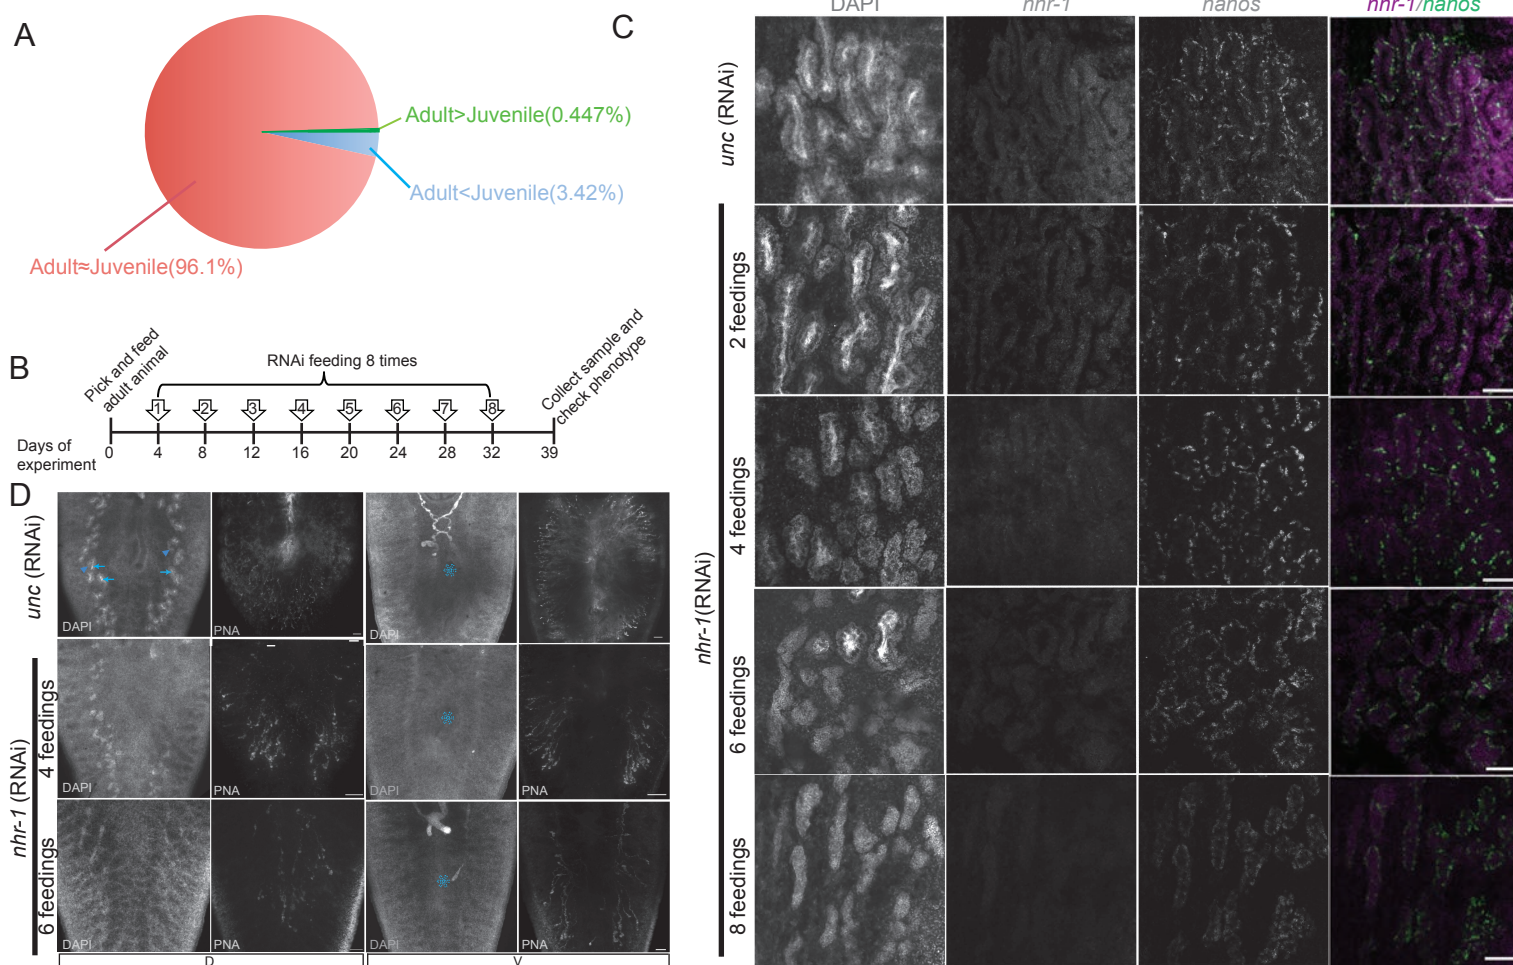

## Figure 2

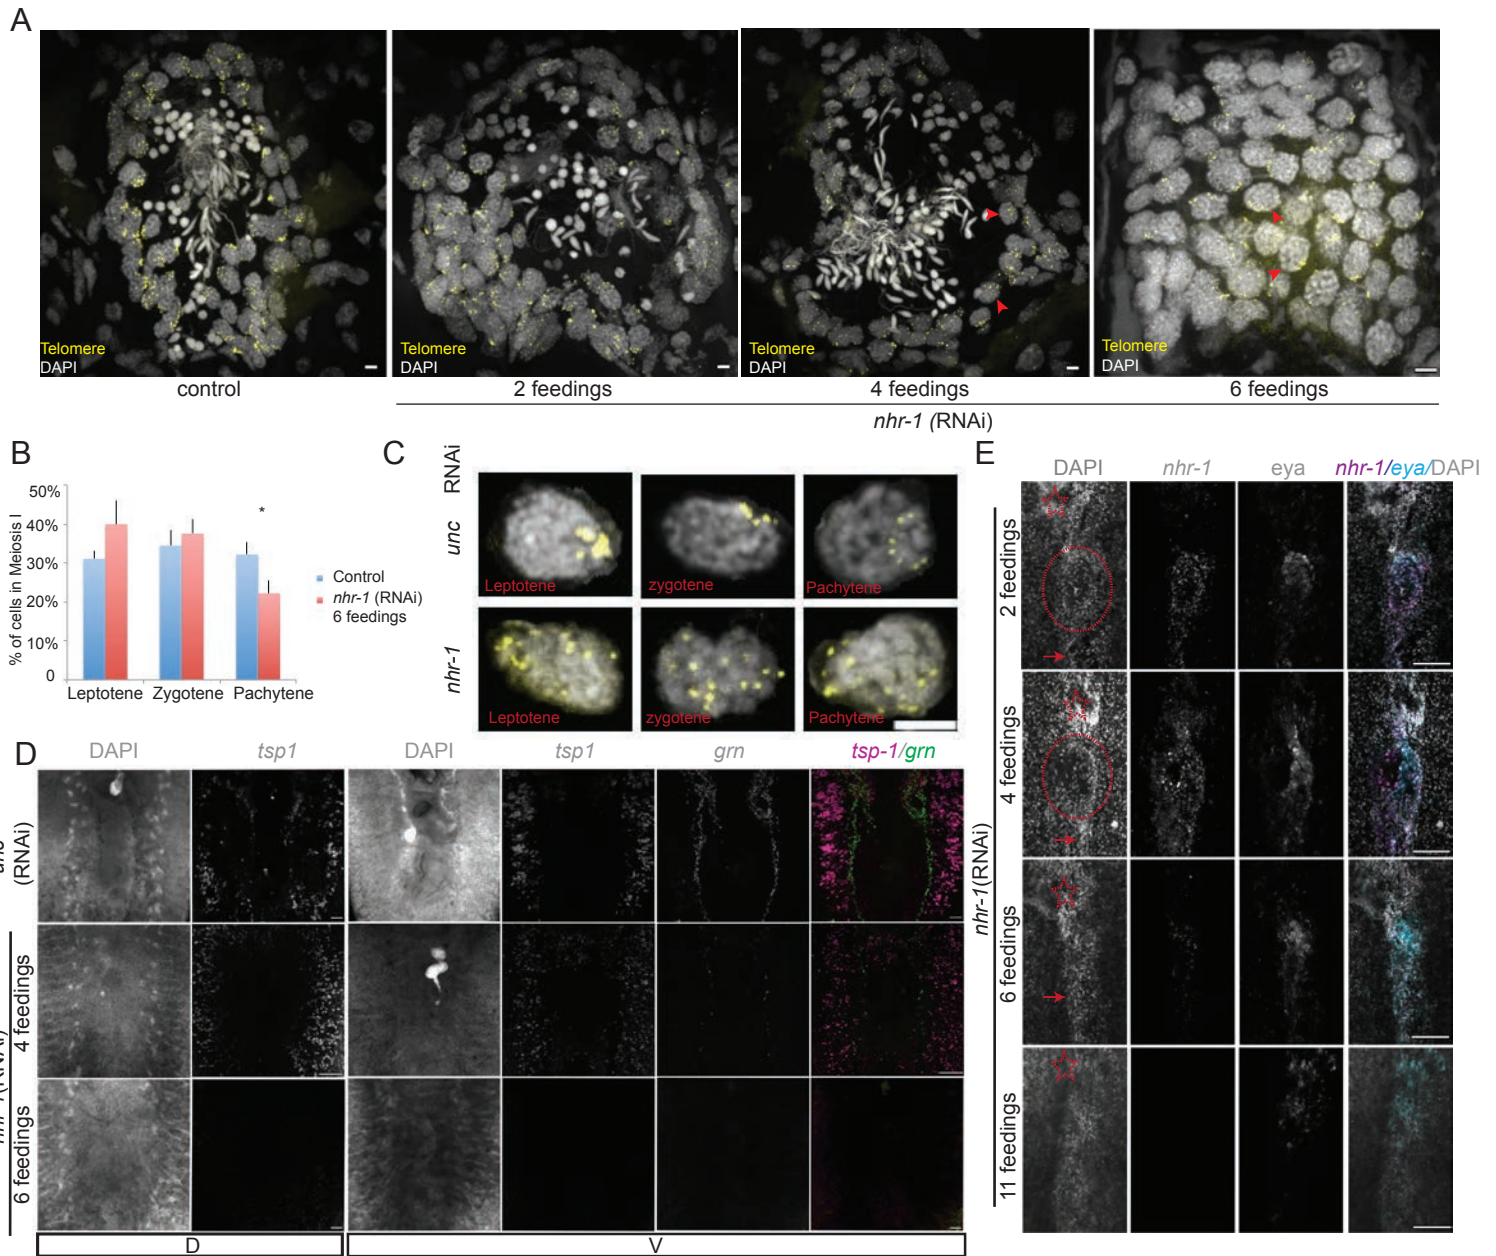

Figure 3

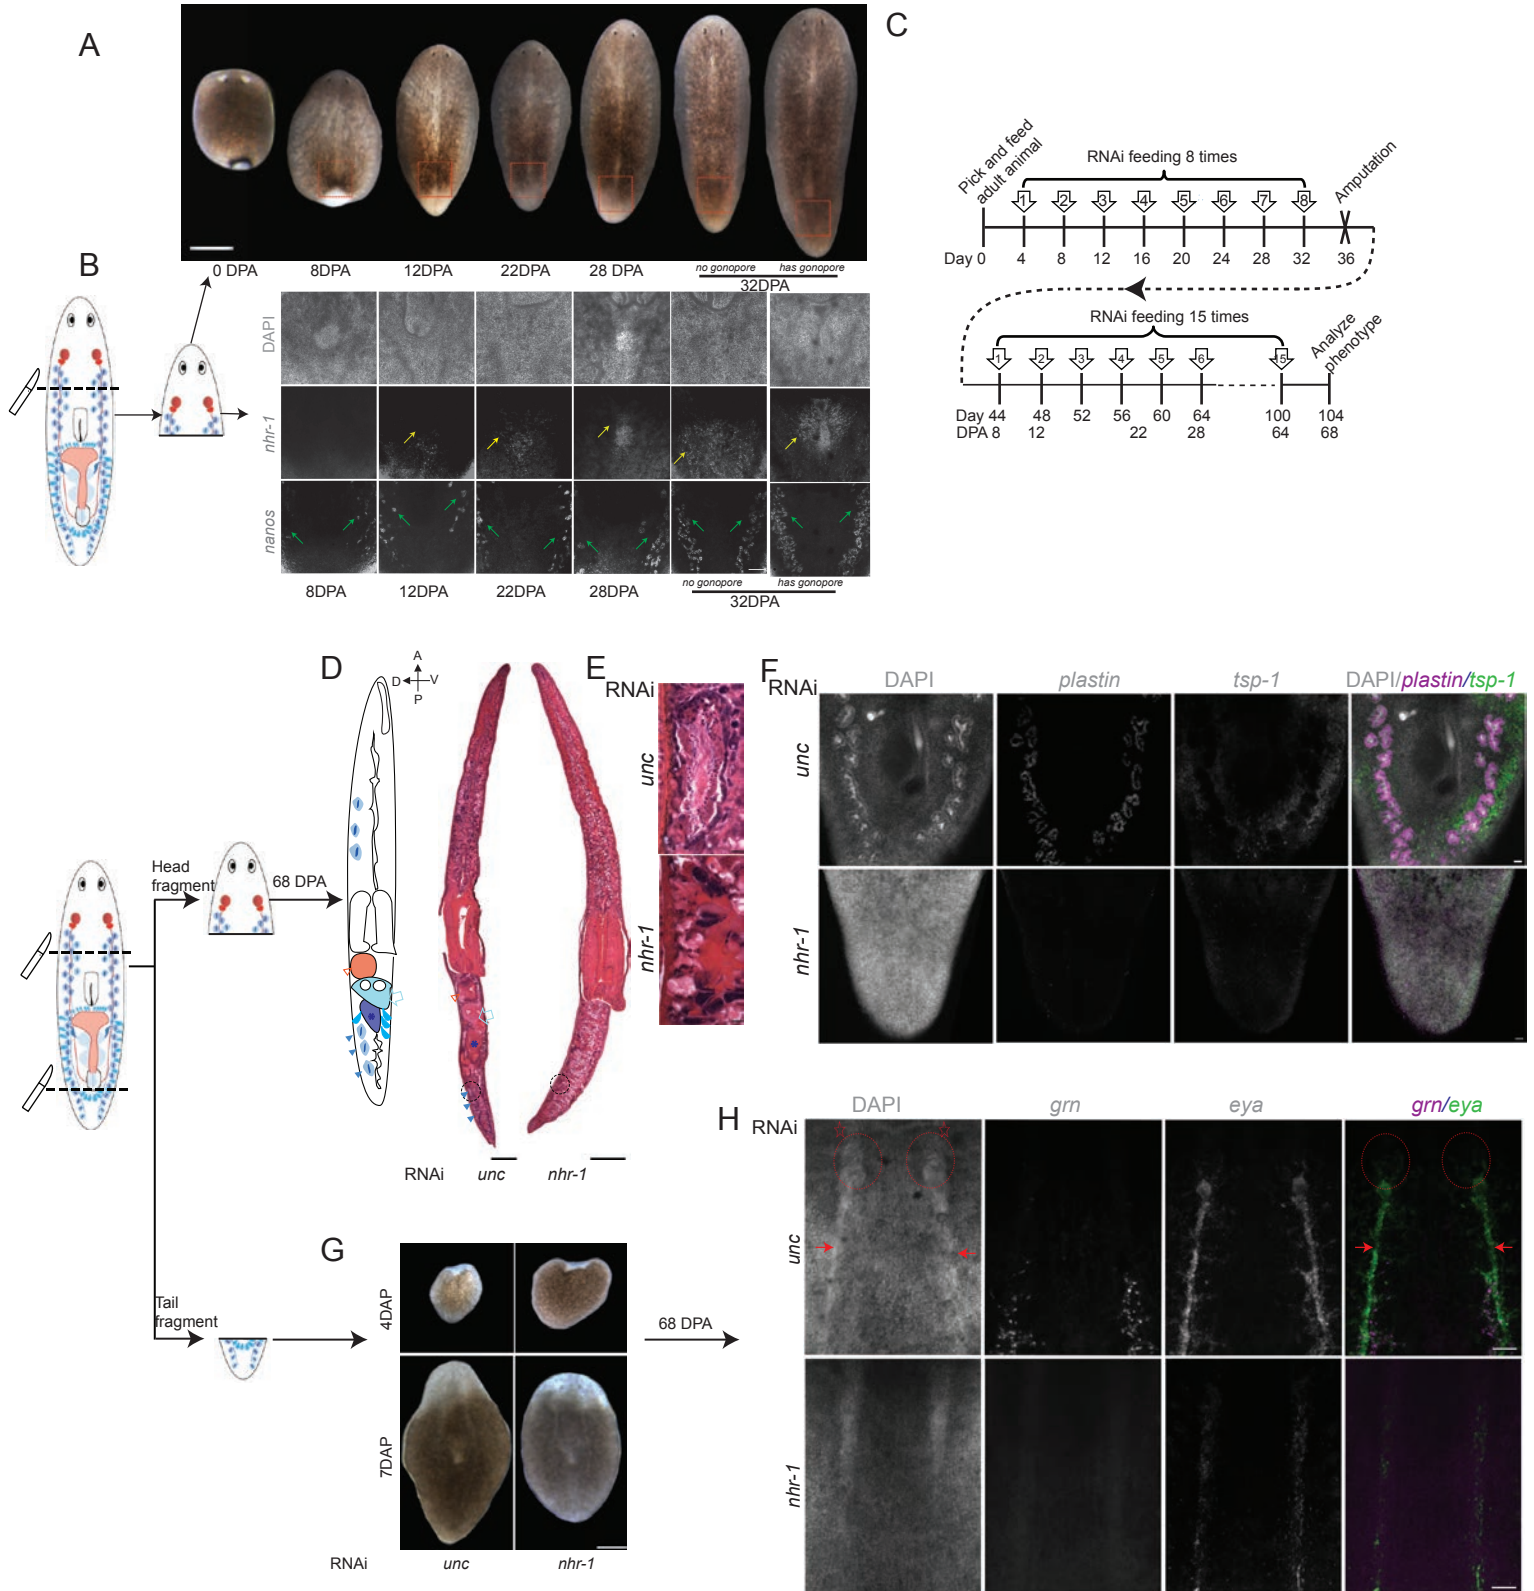

Figure 4

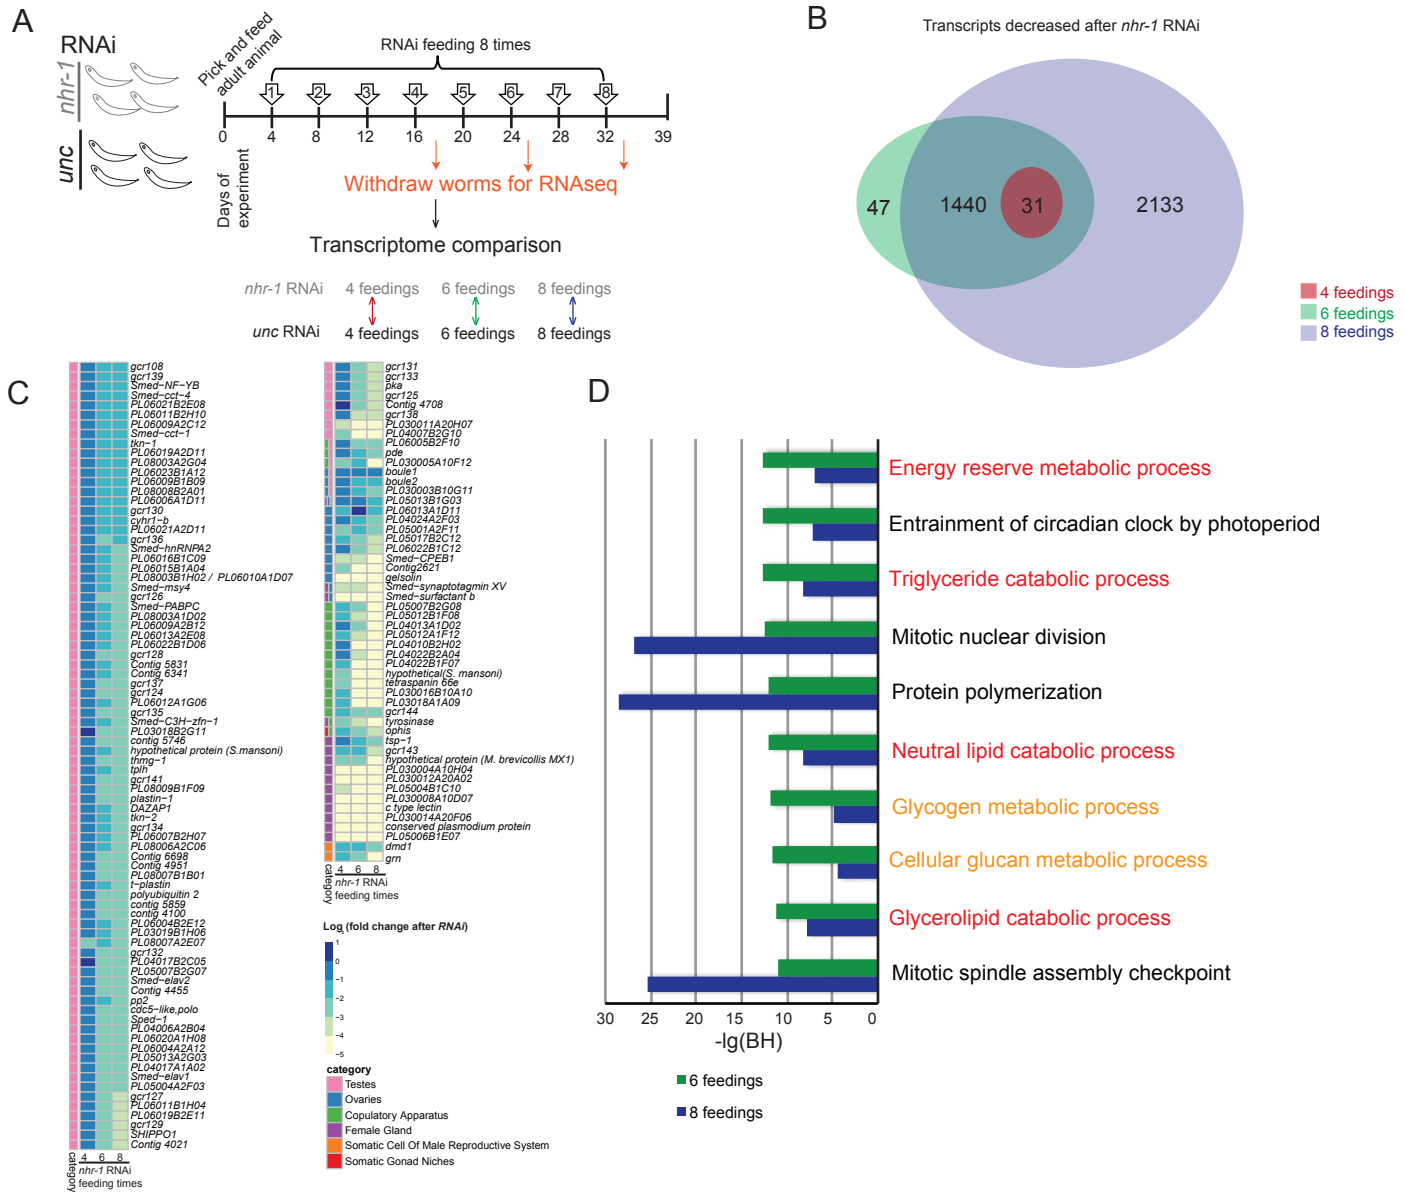

## Figure 5

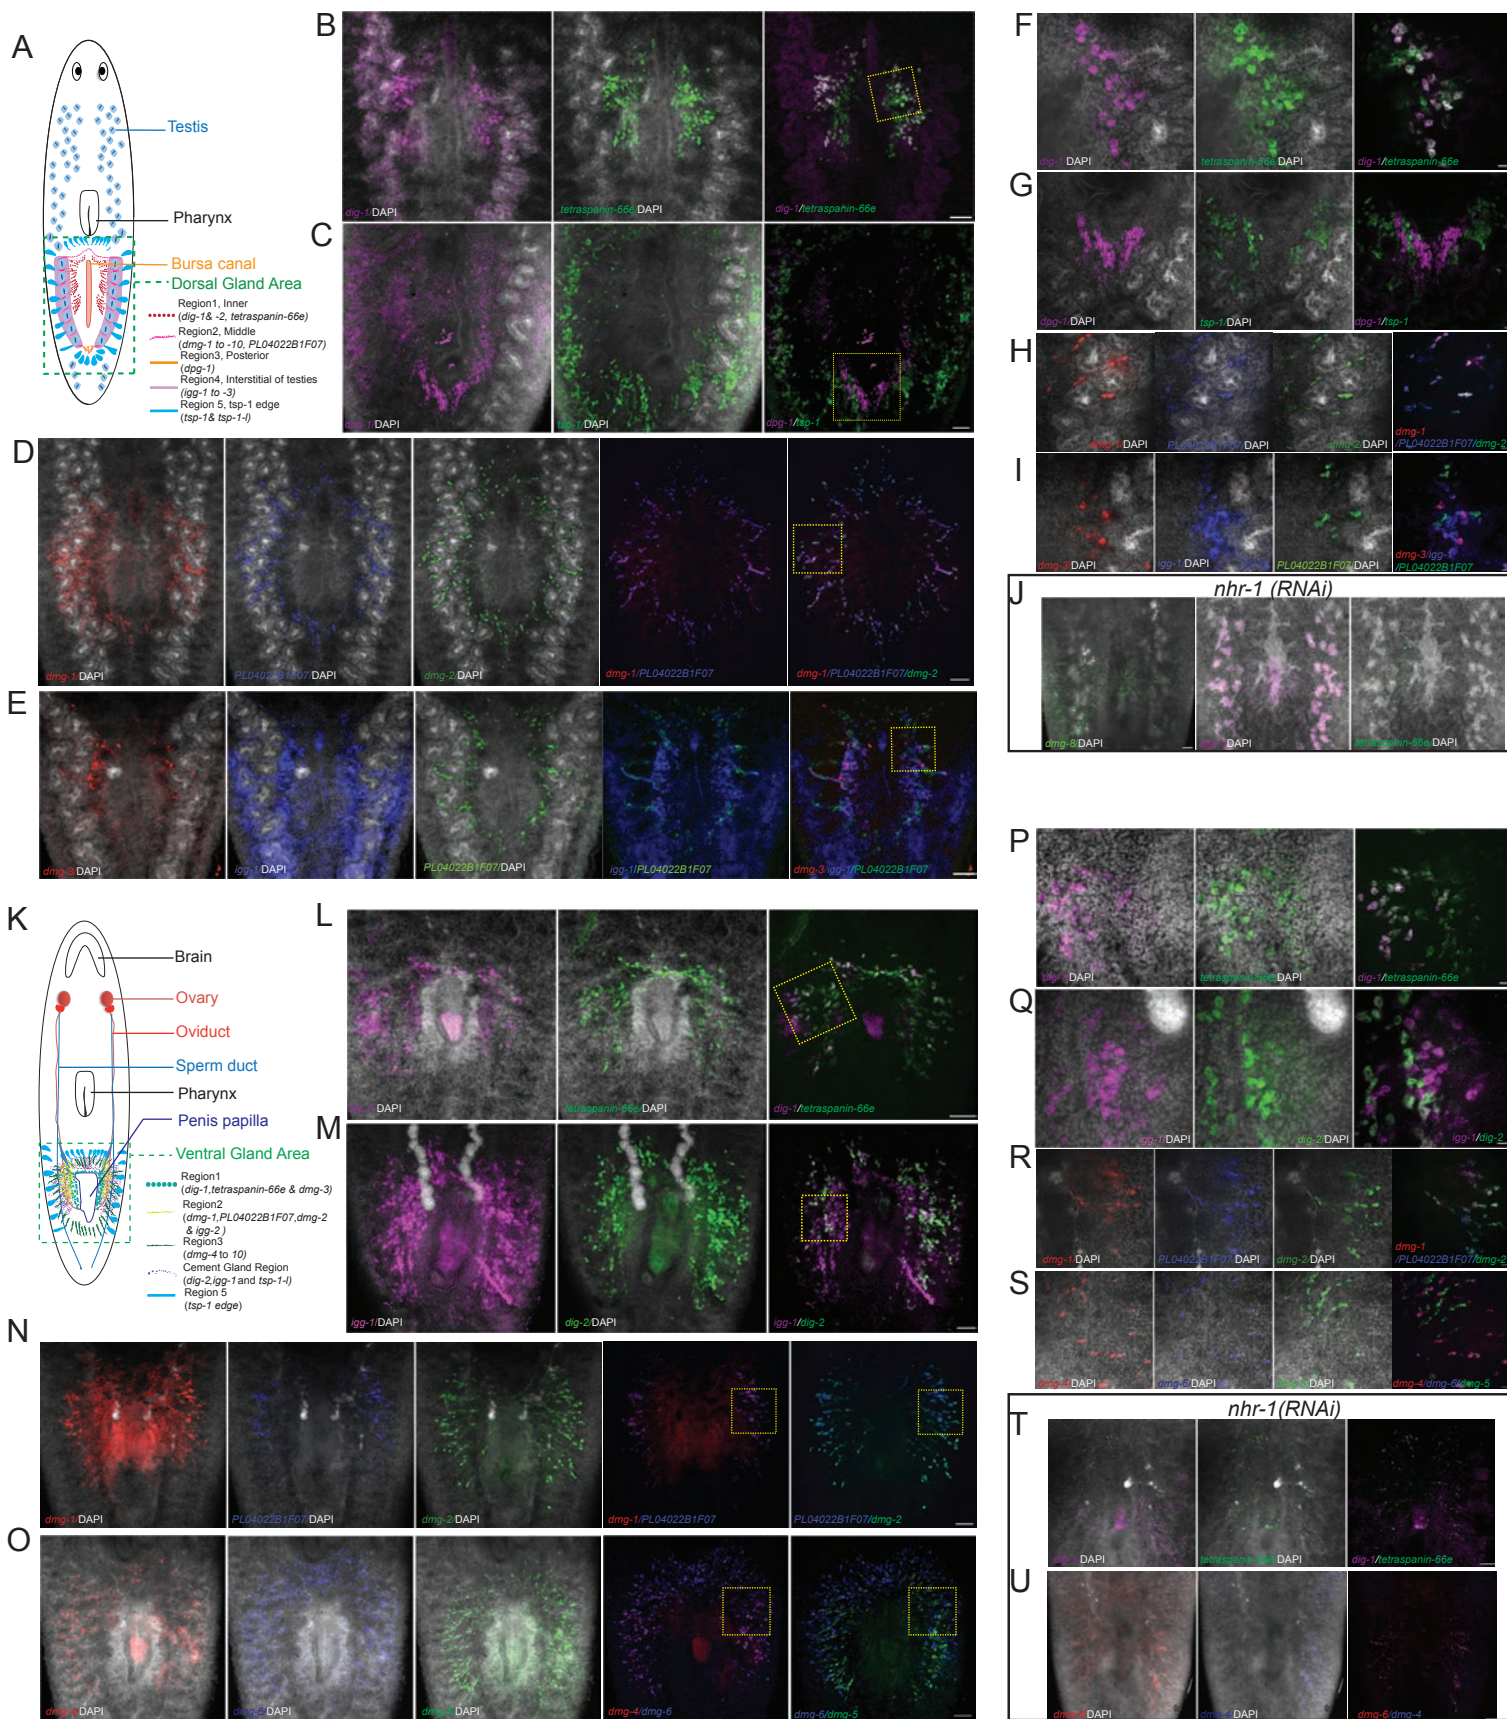

Figure 6

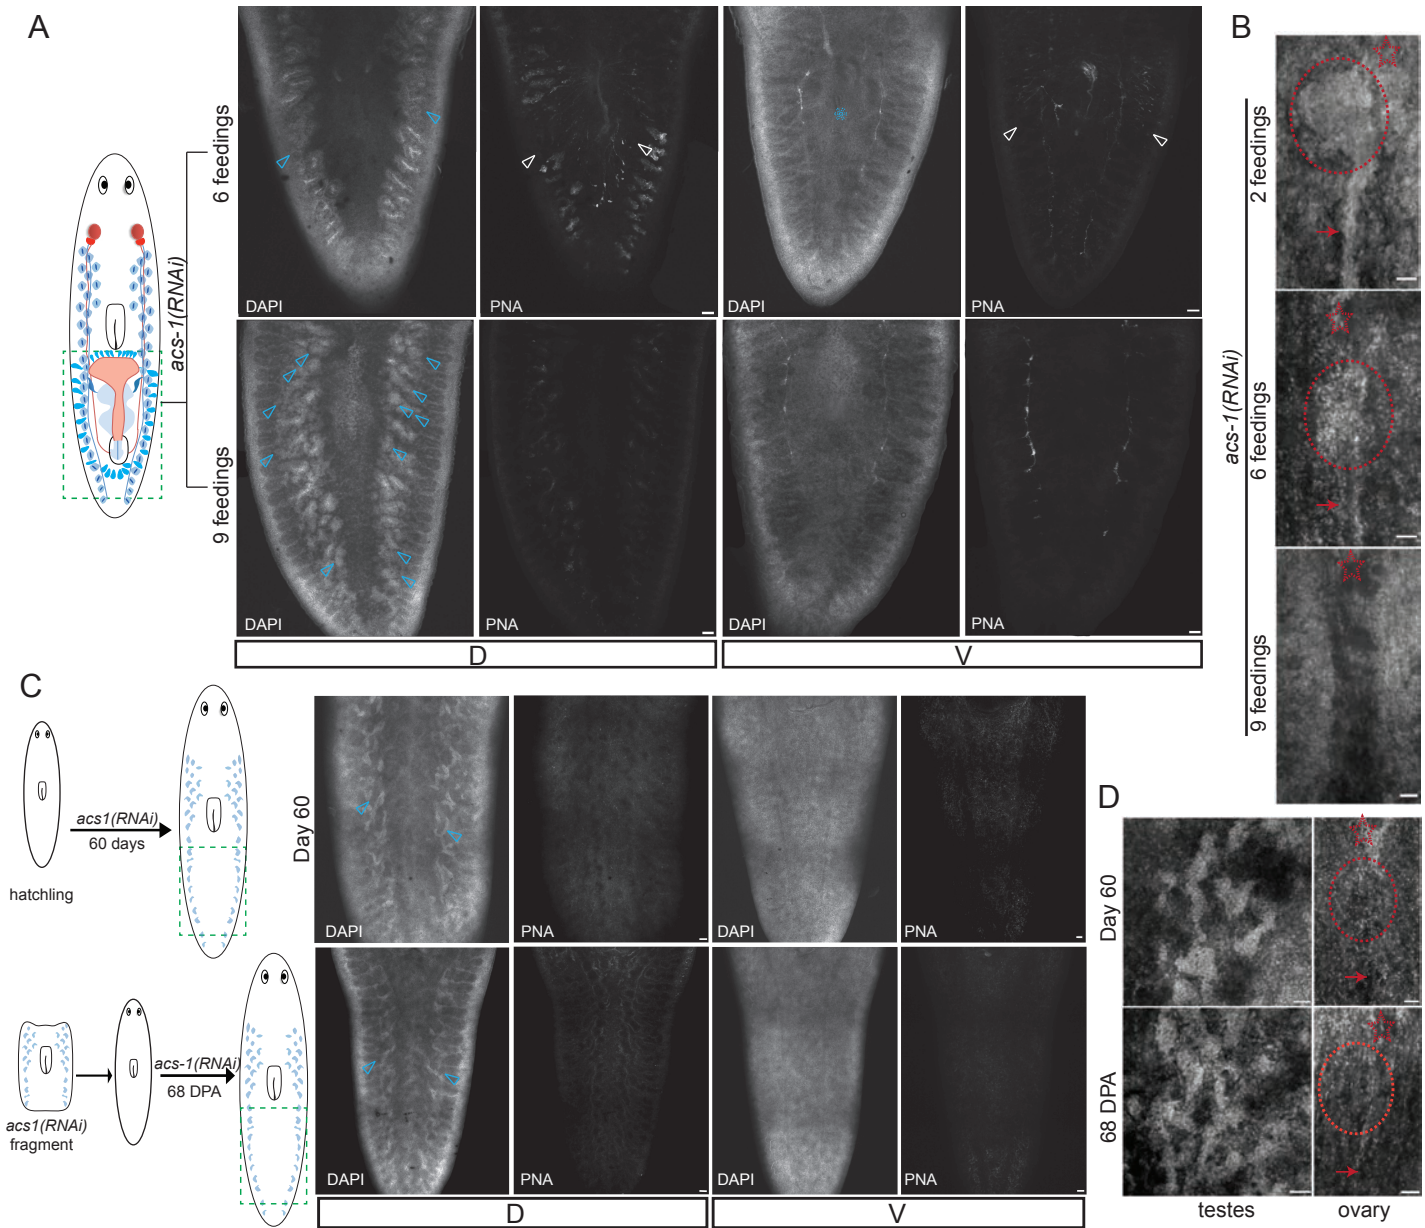

Figure 7

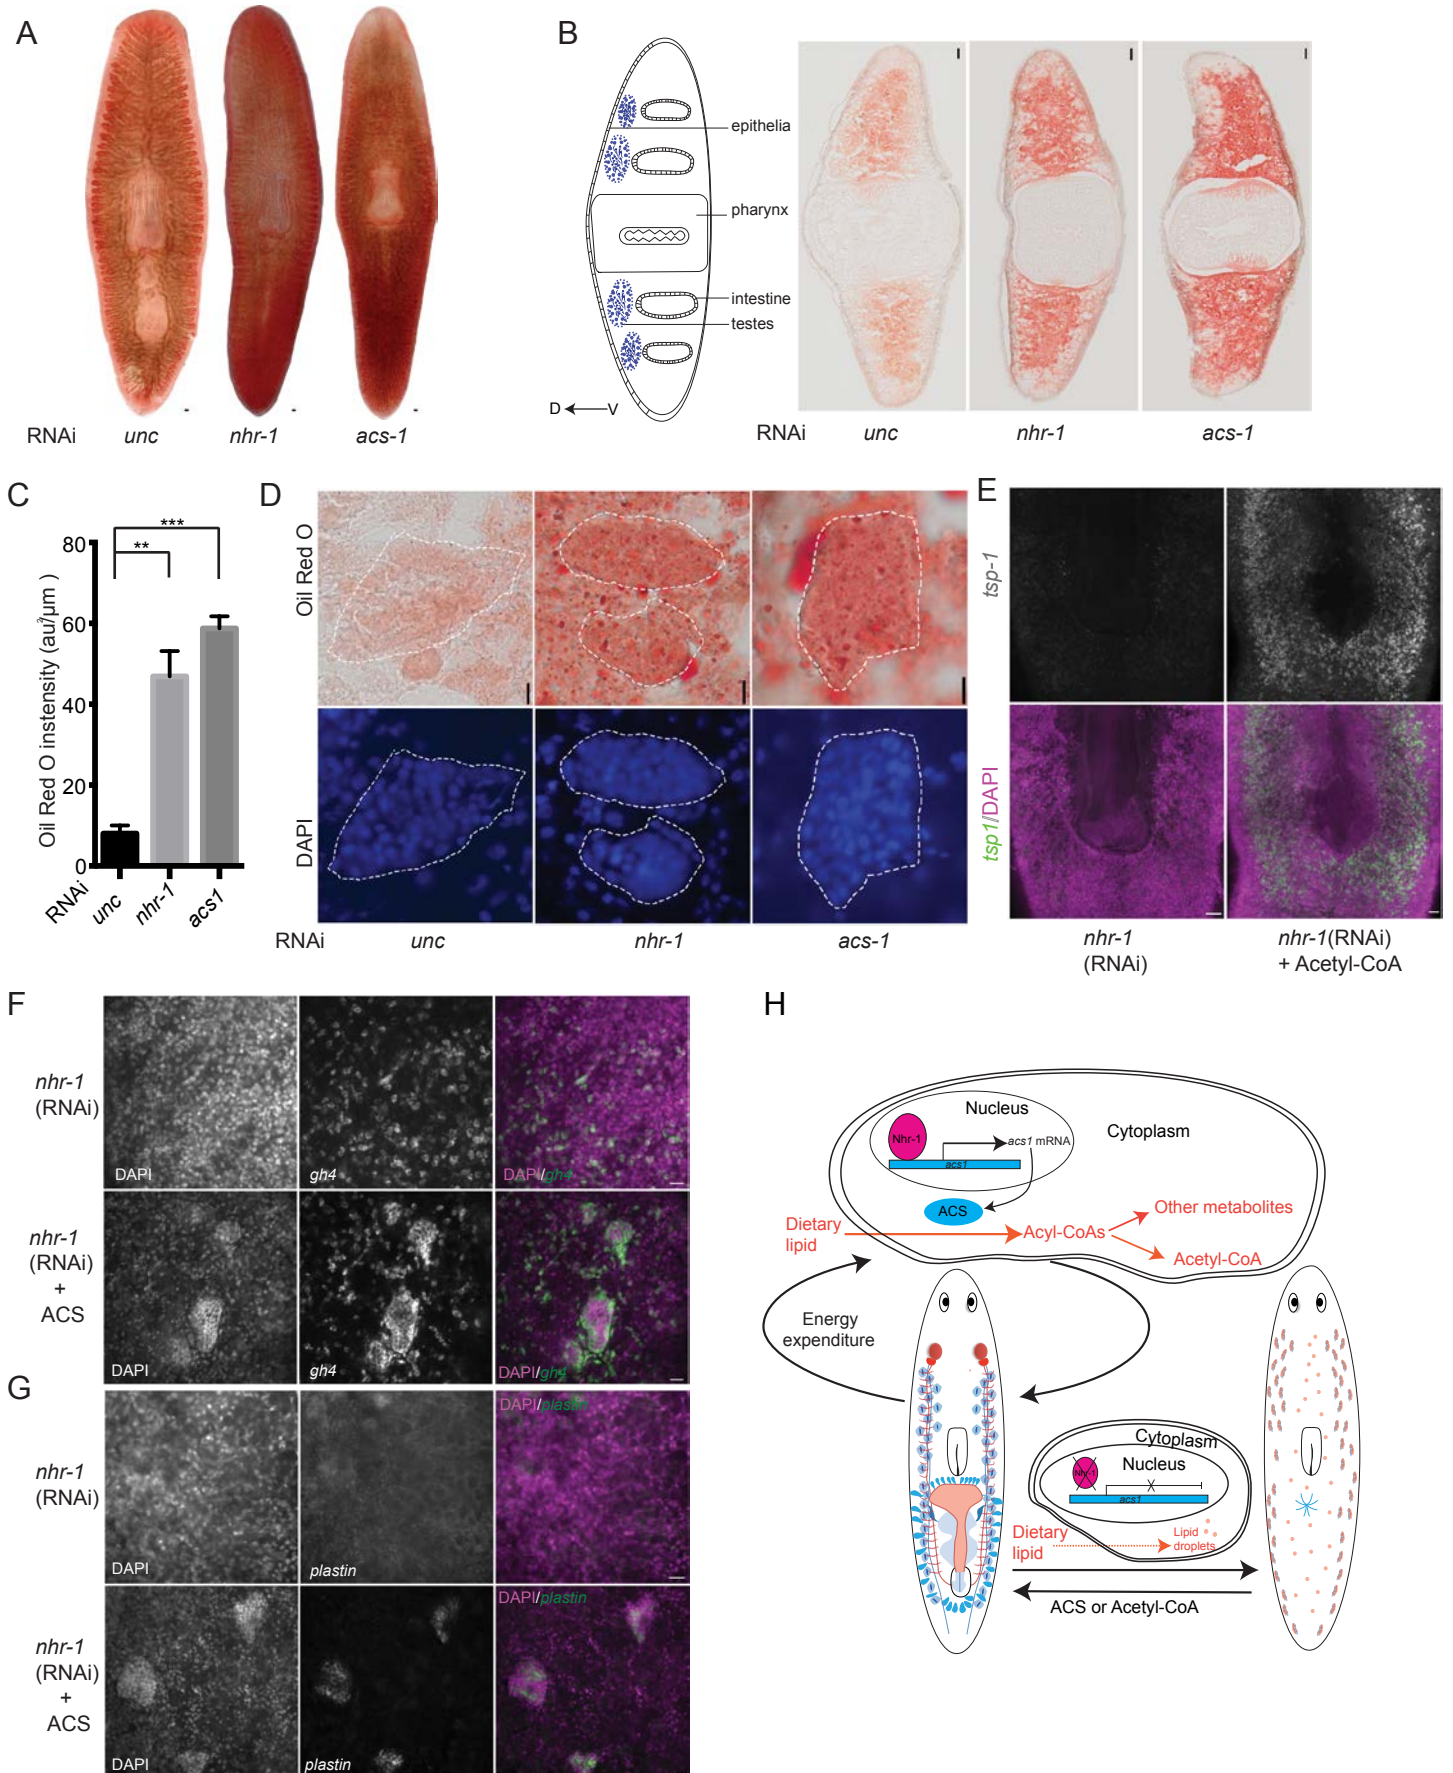



Figure S1

A

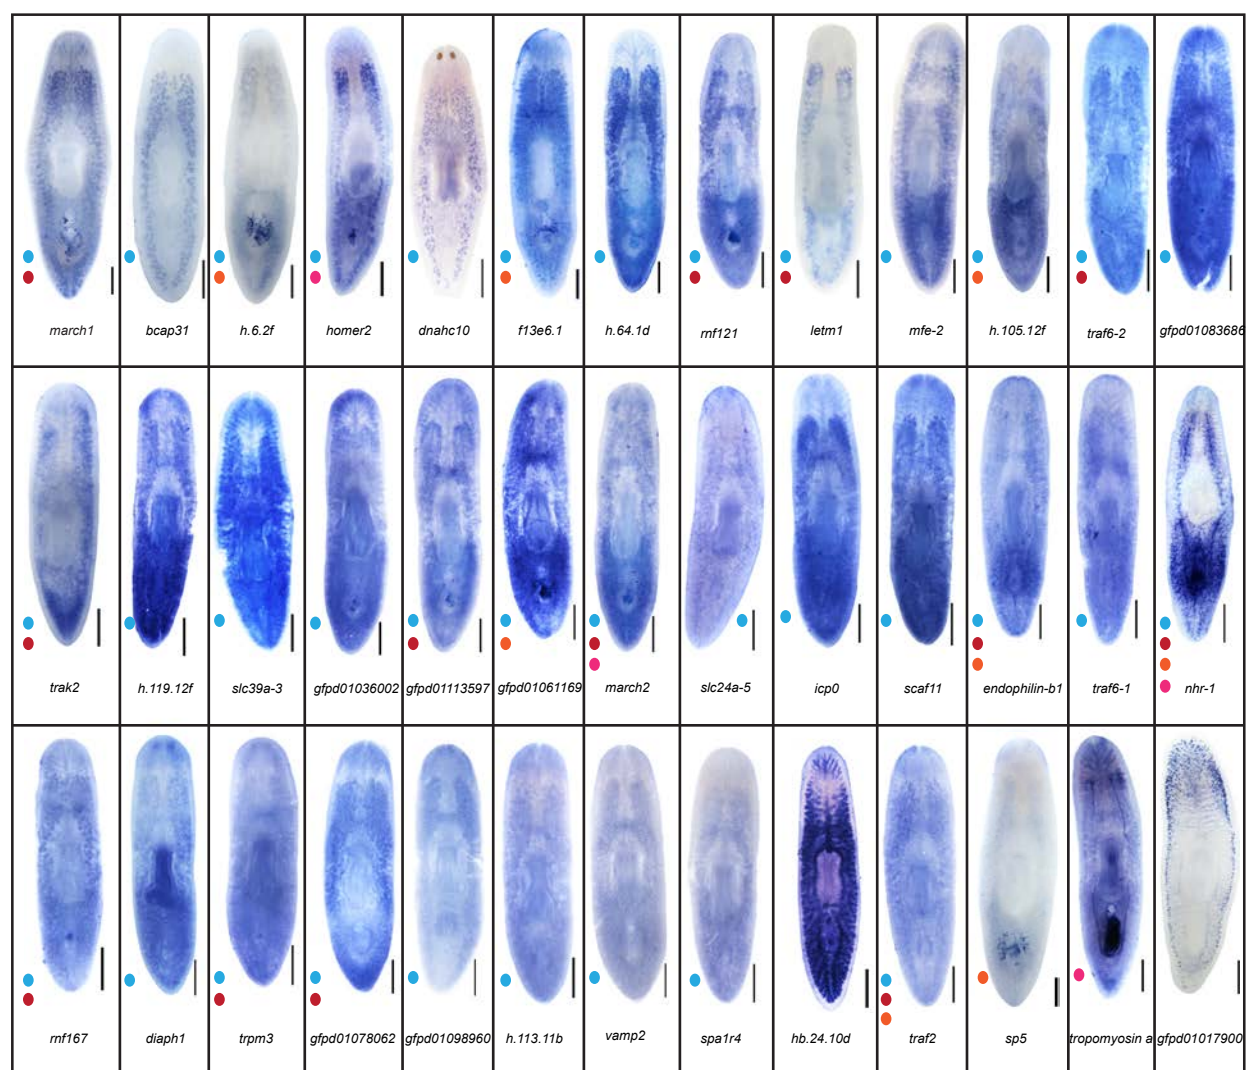

B

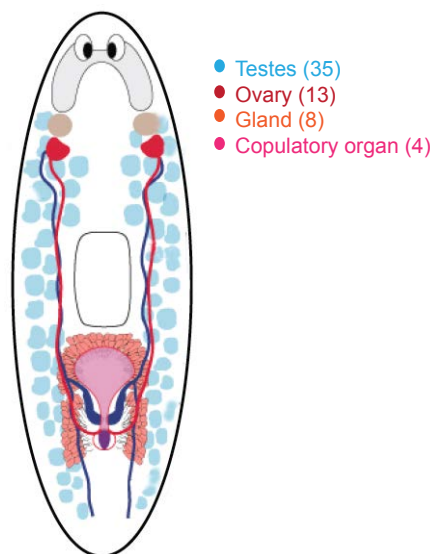

Figure S2

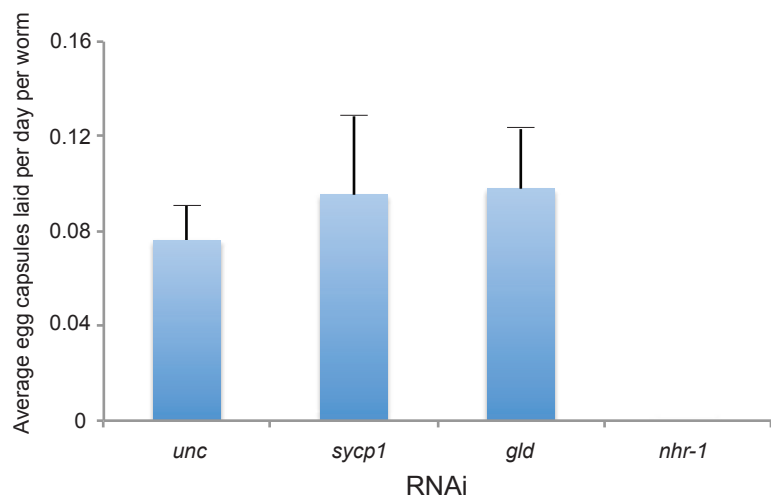

# Figure 6B

A

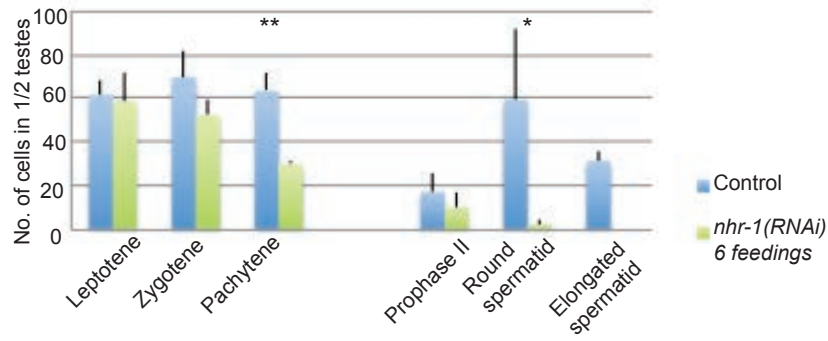

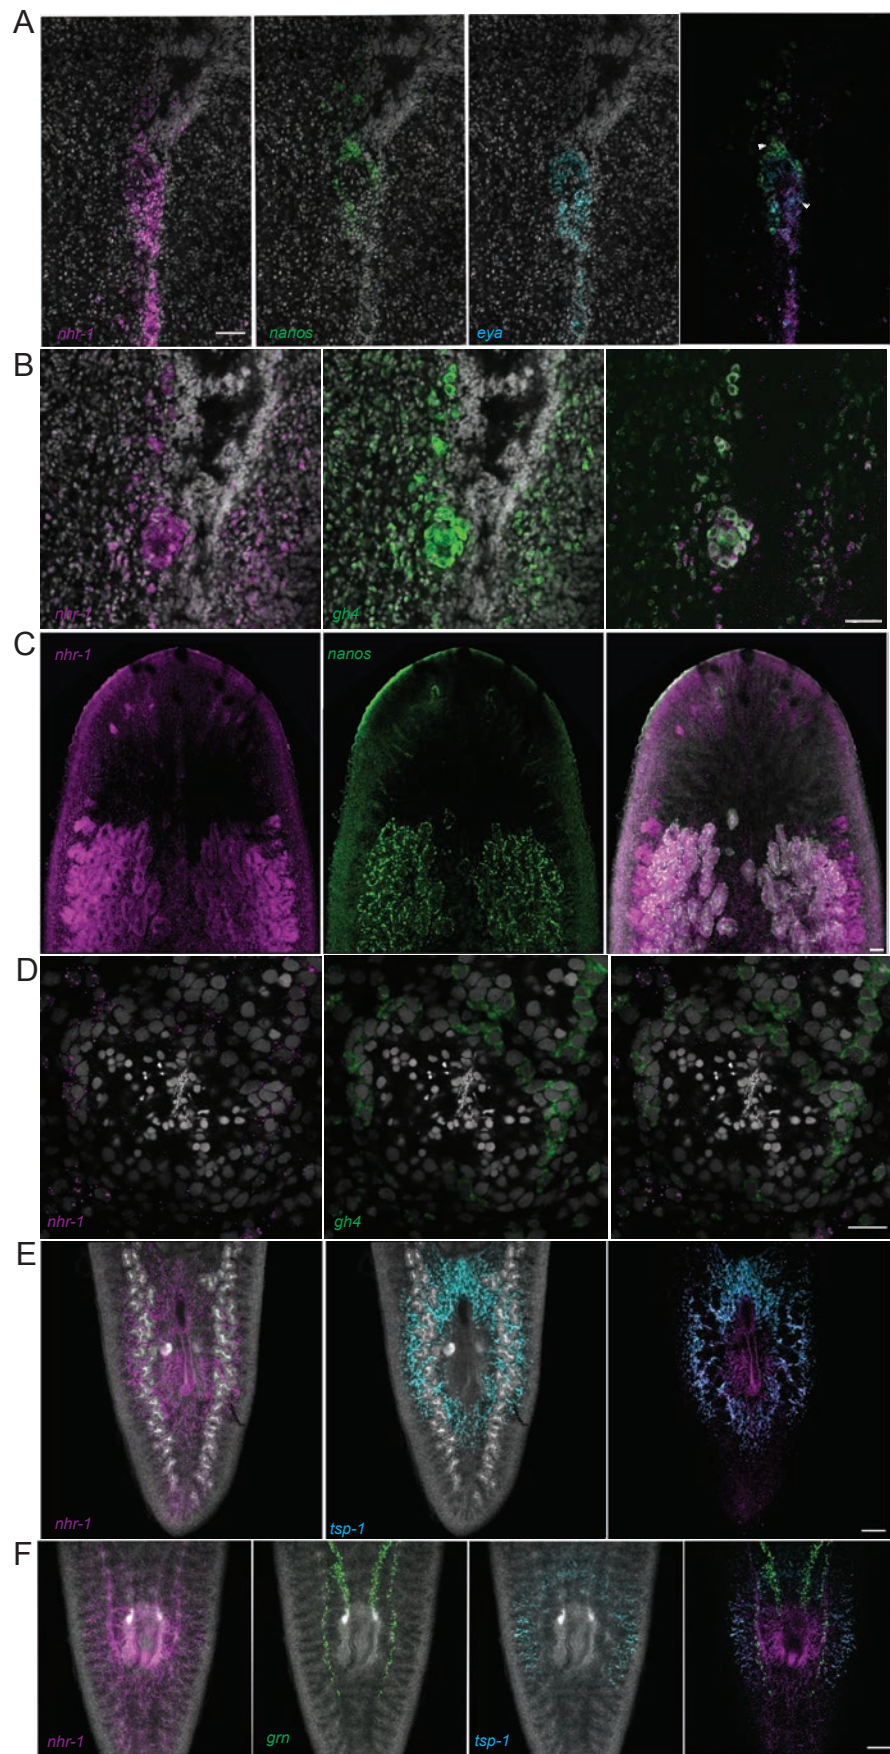

## FigureS5

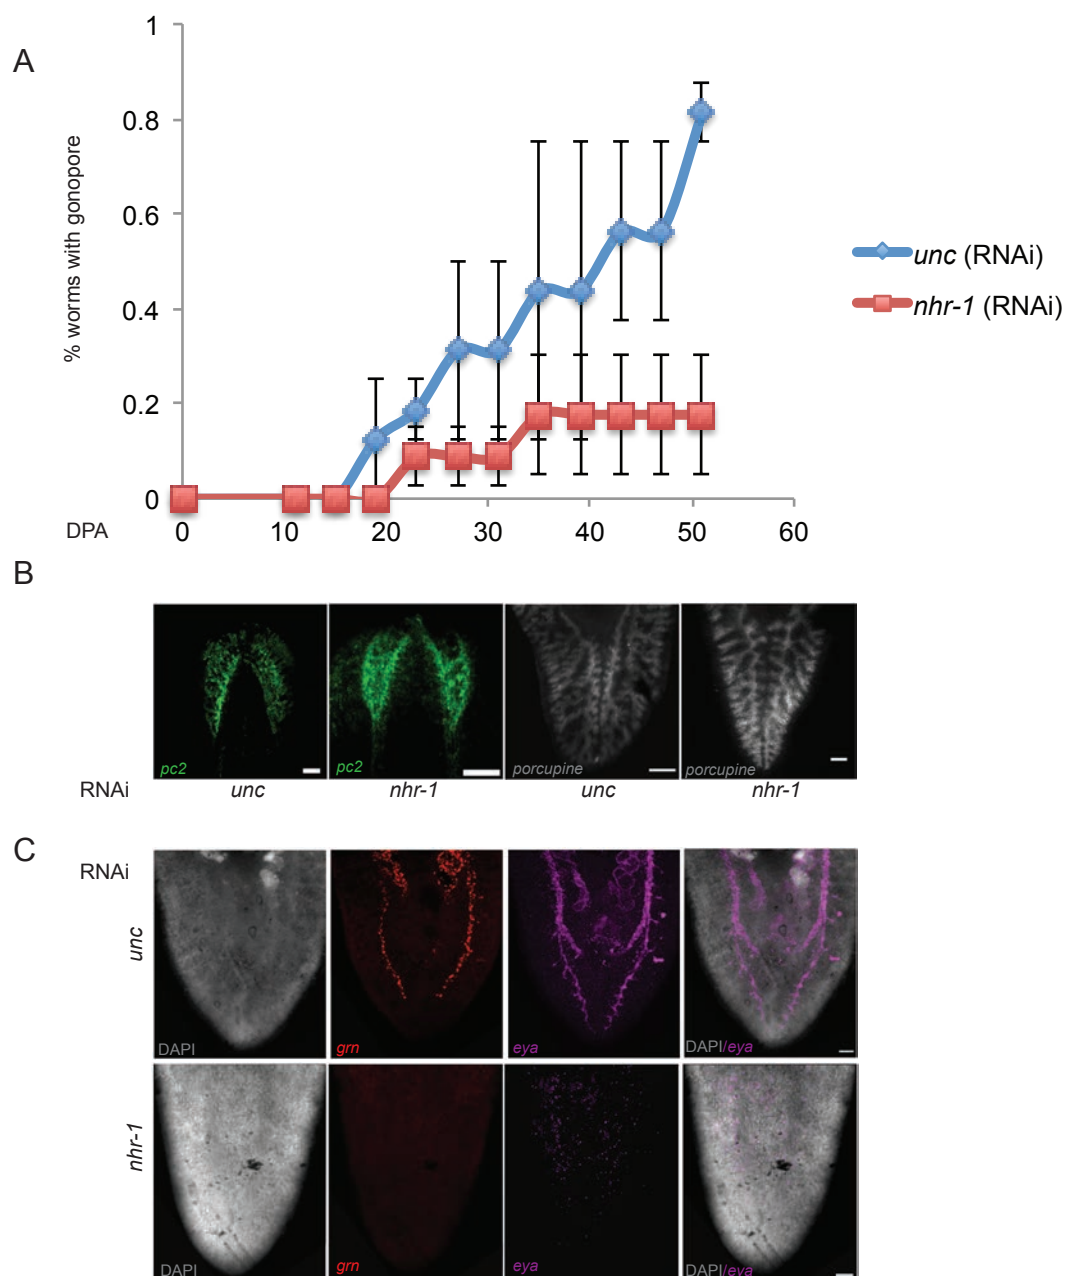

Figure S6

A

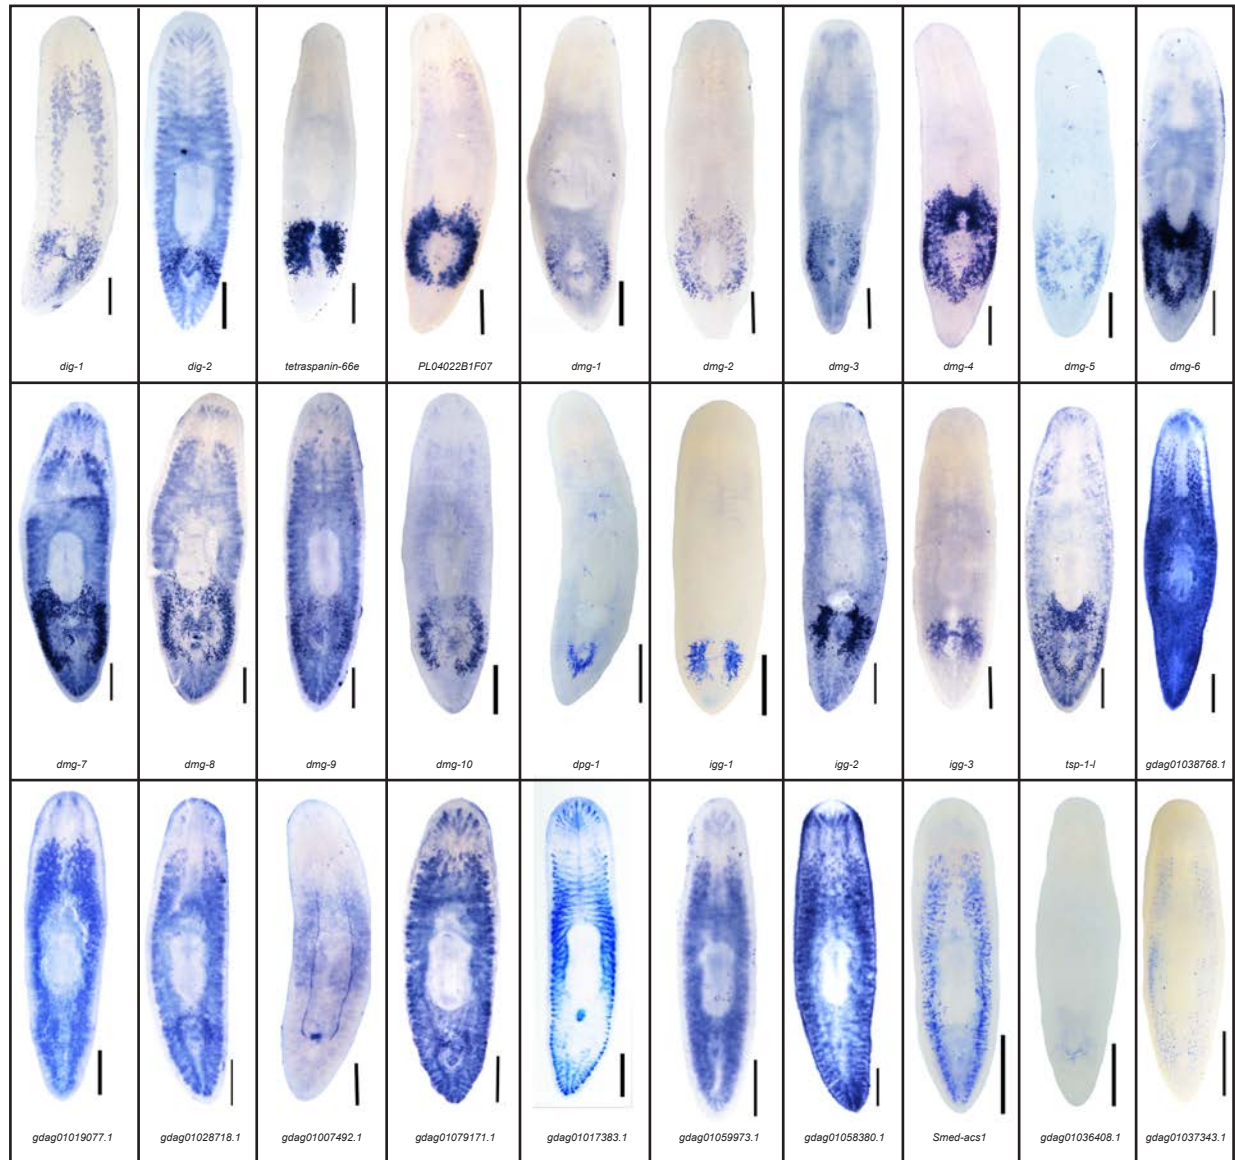

B

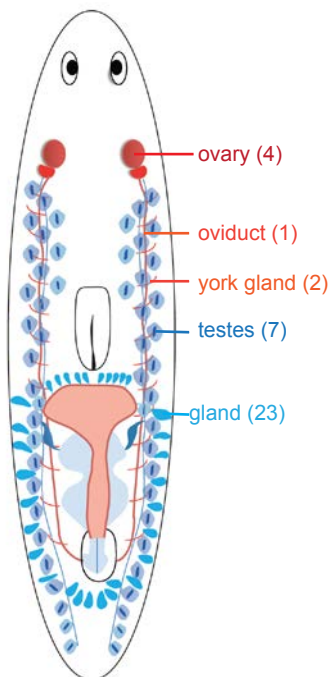

C

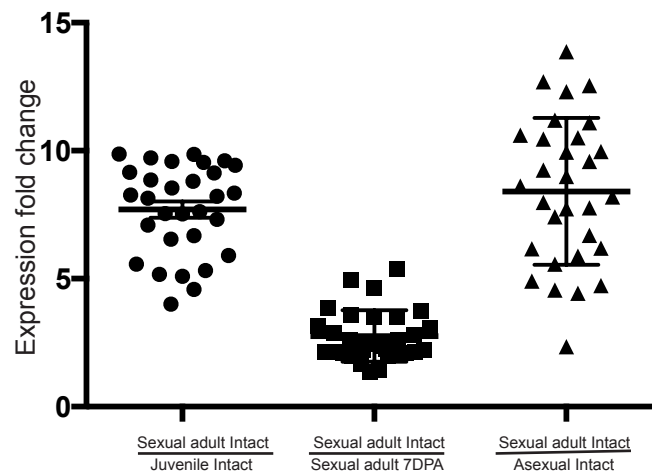

Figure S7

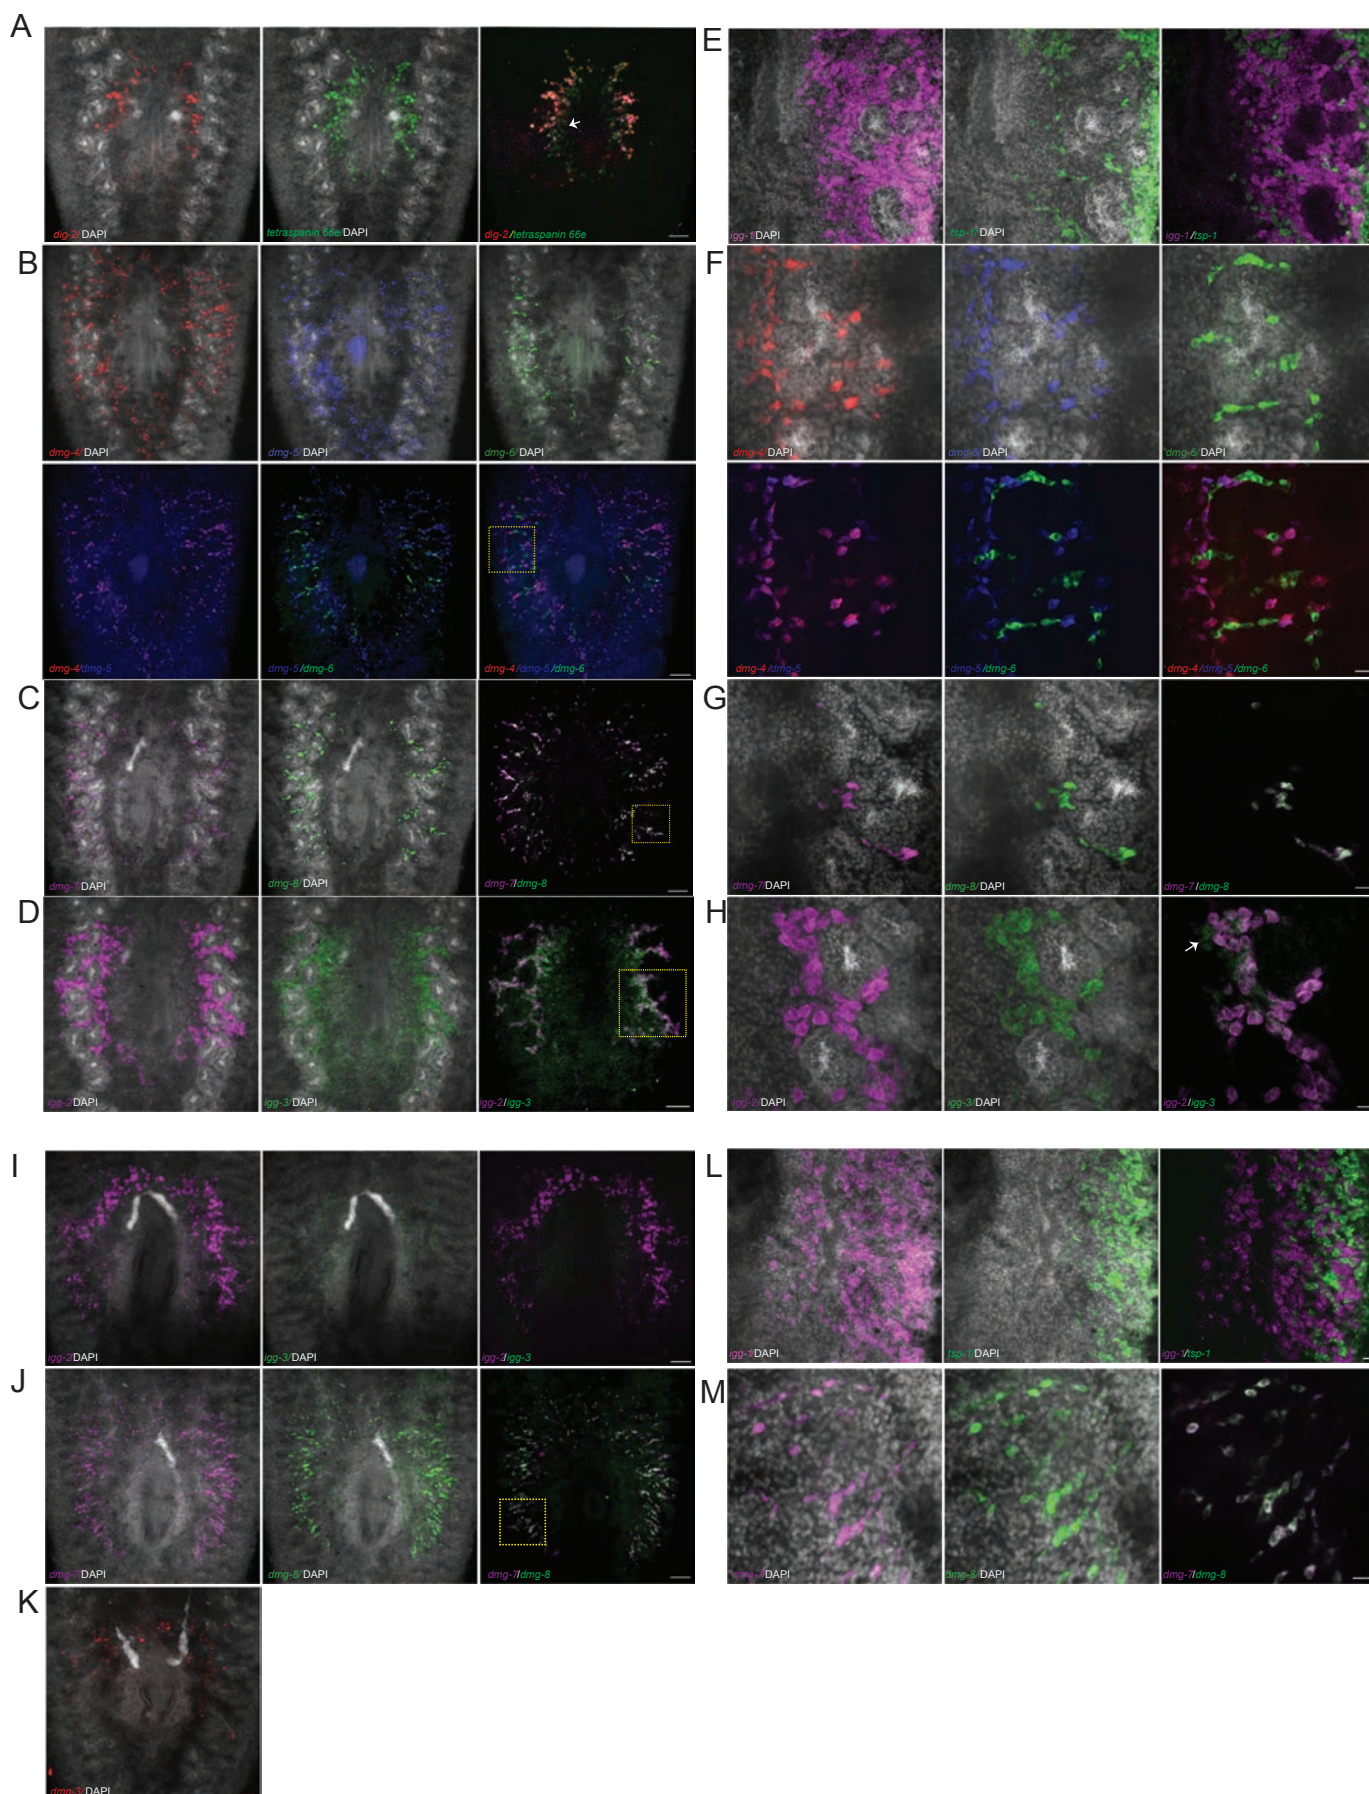

Figure S8

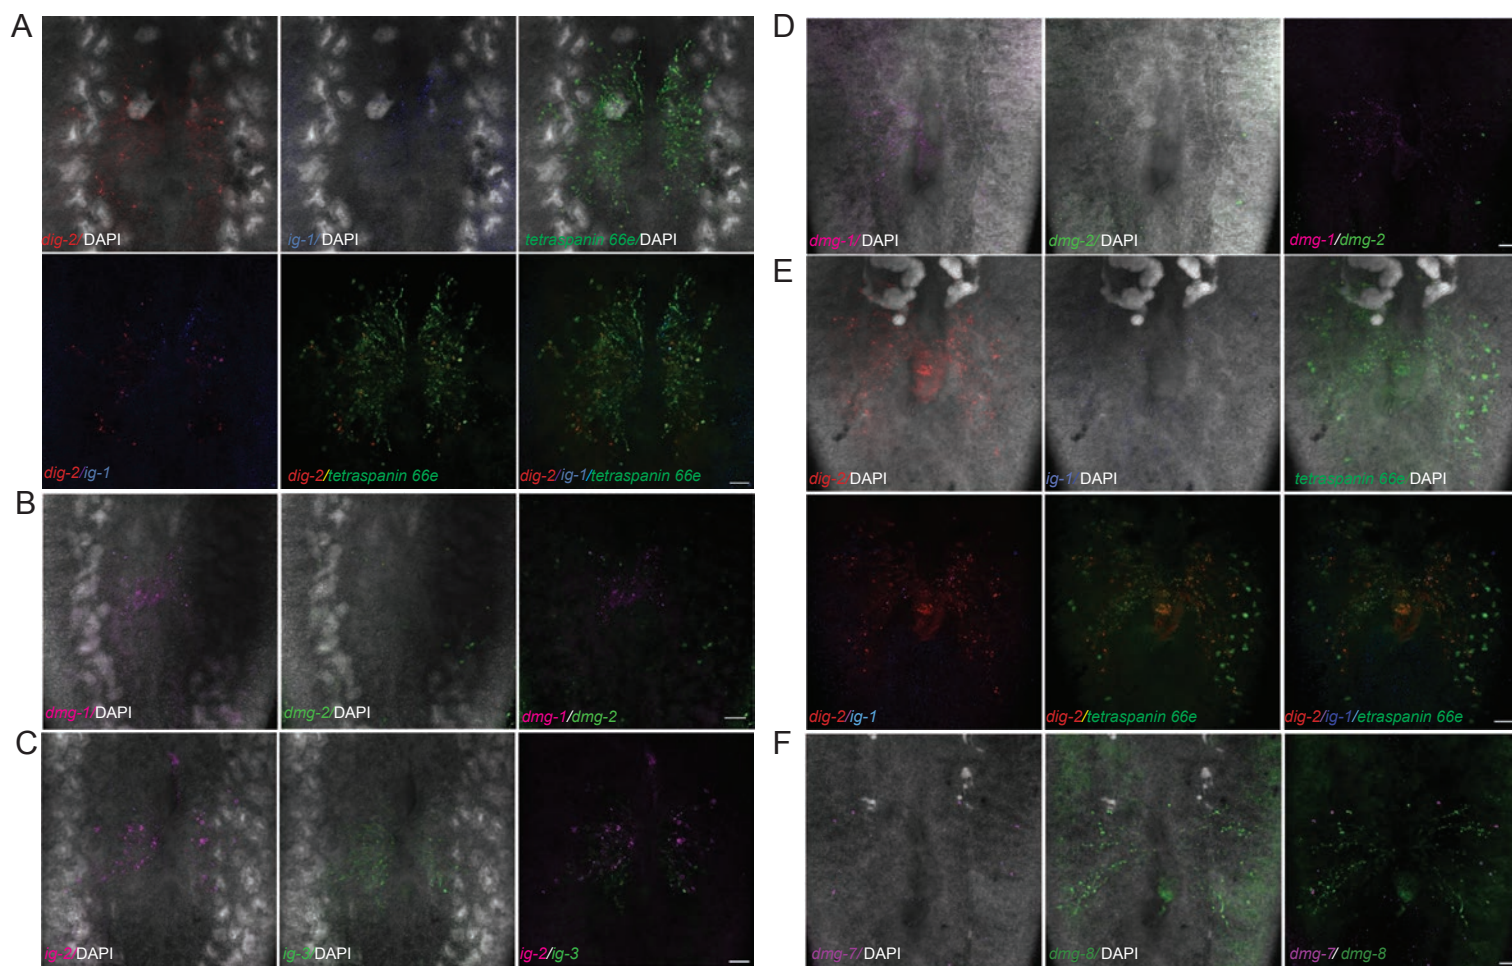



Figure S9

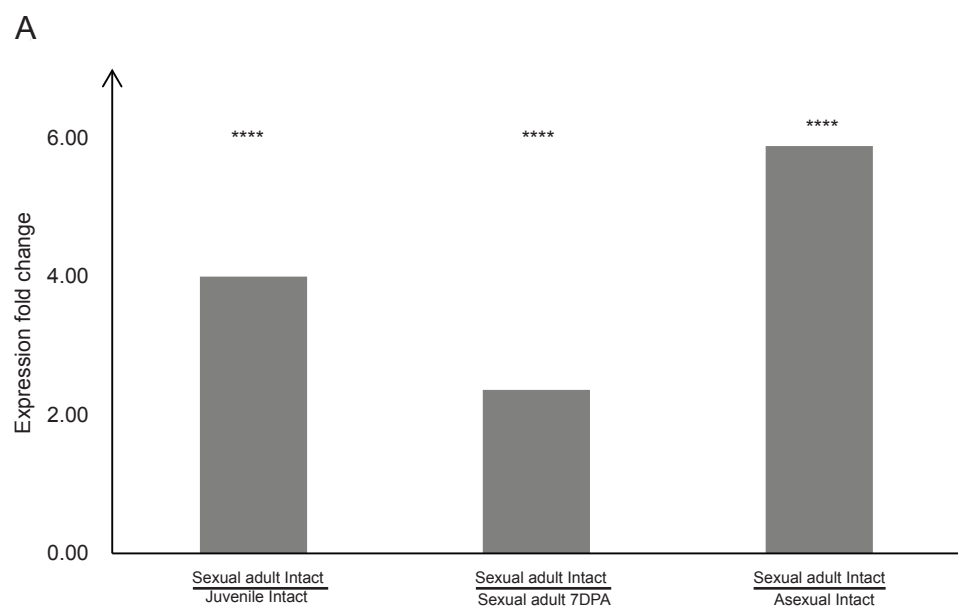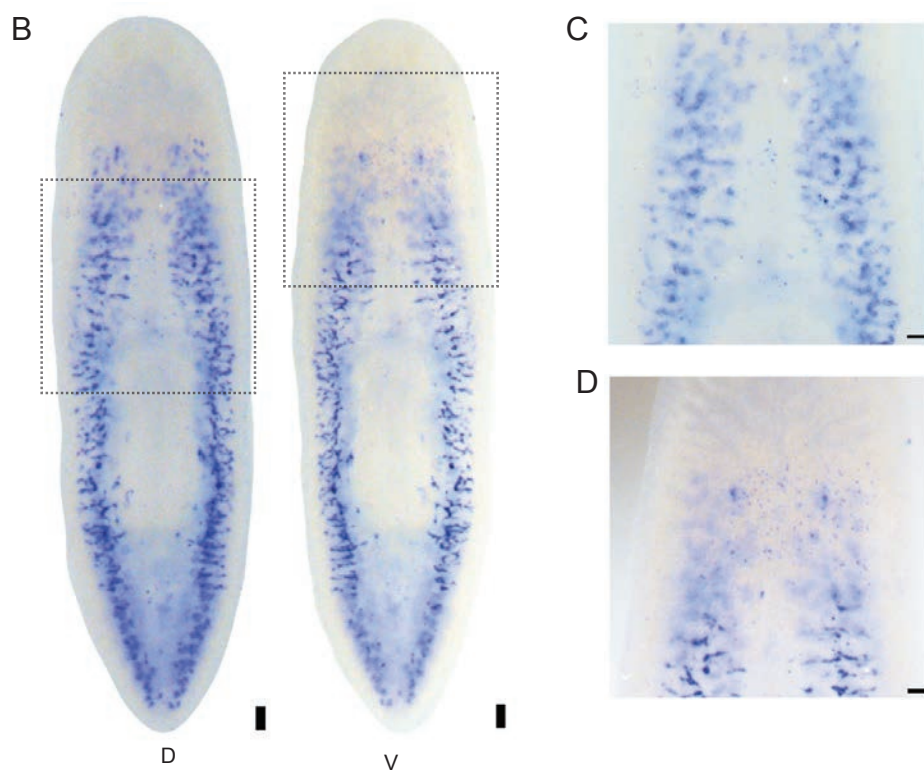

Figure S10

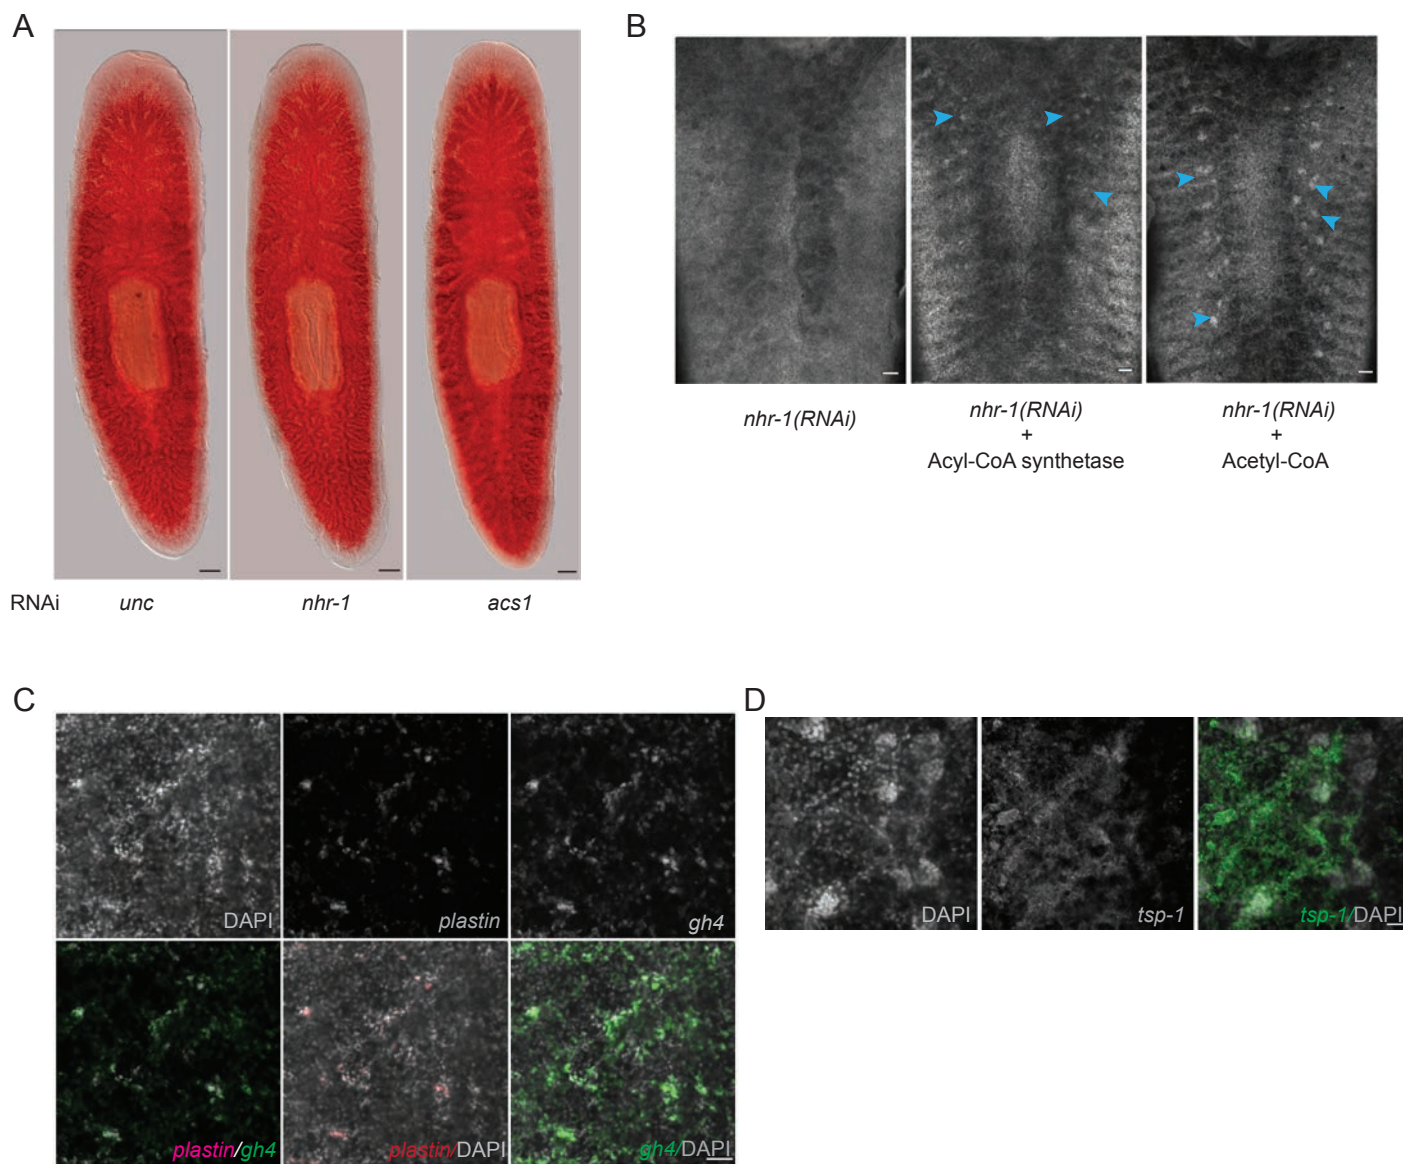

Source: https://www.biorxiv.org/content/biorxiv/early/2018/03/09/279364.1.full.pdf
